---

# LONG-RANGE SEQUENTIAL DEPENDENCIES PRECEDE COMPLEX SYNTACTIC PRODUCTION IN LANGUAGE ACQUISITION

---

Tim Sainburg<sup>a,b</sup>, Anna Mai<sup>c</sup>, and Timothy Q Gentner<sup>a,d,e,f</sup>

<sup>a</sup>Department of Psychology

<sup>b</sup>Center for Academic Research & Training in Anthropogeny

<sup>c</sup>Department of Linguistics

<sup>d</sup>Neurosciences Graduate Program

<sup>e</sup>Neurobiology Section

<sup>f</sup>Kavli Institute for Brain and Mind

UC San Diego

La Jolla, CA, 92093

{tsainburg, acmai, tgentner}@ucsd.edu

August 19, 2020

## Abstract

1 To convey meaning, human language relies on hierarchically organized, long-range relationships spanning words, phrases, sentences, and discourse. The strength of the relationships  
2 between sequentially ordered elements of language (e.g., phonemes, characters, words) decays following a power law as a function of sequential distance. To understand the origins of  
3 these relationships, we examined long-range statistical structure in the speech of human children at multiple developmental time points, along with non-linguistic behaviors in humans  
4 and phylogenetically distant species. Here we show that adult-like power-law statistical dependencies precede the production of hierarchically-organized linguistic structures, and  
5 thus cannot be driven solely by these structures. Moreover, we show that similar long-range relationships occur in diverse non-linguistic behaviors across species. We propose that the  
6 hierarchical organization of human language evolved to exploit pre-existing long-range structure present in much larger classes of non-linguistic behavior, and that the cognitive capacity  
7 to model long-range hierarchical relationships preceded language evolution. We call this the  
8 Statistical Scaffolding Hypothesis for language evolution.  
9  
10  
11  
12  
13  
14

15 **Keywords** language · hierarchy · power law · evolution

## 16 1 Significance Statement

17 Human language is uniquely characterized by semantically meaningful hierarchical organization, conveying  
18 information over long timescales. At the same time, many non-linguistic human and animal behaviors are  
19 also often characterized by richly hierarchical organization. Here, we compare the long-timescale statistical  
20 dependencies present in language to those present in non-linguistic human and animal behaviors as well as  
21 language production throughout childhood. We find adult-like, long-timescale relationships early in language  
22 development, before syntax or complex semantics emerge, and we find similar relationships in non-linguistic  
23 behaviors like cooking and even housefly movement. These parallels demonstrate that long-range statistical  
24 dependencies are not unique to language and suggest a possible evolutionary substrate for the long-range  
25 hierarchical structure present in human language.

## 26 **2 Introduction**

27 Since Shannon’s original work characterizing the sequential dependencies present in language, the structure  
28 underlying long-range information in language has been the subject of a great deal of interest in linguistics,  
29 statistical physics, cognitive science, and psychology [1–20]. Long-range information content refers to the  
30 dependencies between discrete elements (e.g., units of spoken or written language) that persist over long  
31 sequential distances spanning words, phrases, sentences, and discourse. For example, in Shannon’s original  
32 work, participants were given a series of letters from an English text and were asked to predict the letter  
33 that would occur next. Using the responses of these participants, Shannon derived an upper bound on the  
34 information added by including each preceding letter in the sequence. More recent investigations compute  
35 statistical dependencies directly from language corpora using either correlation functions [3, 4, 7, 8, 10, 12, 13]  
36 or mutual information (MI) functions [2, 5, 6, 14] between elements in a sequence. In both cases, sequential  
37 relationships are calculated as a function of the sequential distance between events. For example, in the  
38 sequence  $a \rightarrow b \rightarrow c \rightarrow d \rightarrow e \rightarrow f$ , at a distance of three elements, relationships would be calculated over  
39 the pairs  $a$  and  $d$ ,  $b$  and  $e$ , and  $c$  and  $f$ .

40 On average, as the distance between elements increases, statistical dependencies grow weaker. Across many  
41 different sequence types, including phonemes, syllables, and words in both text and speech, the decay of long-  
42 range correlations and MI in language follows a power law (Eq. 6) [2–14, 18, 19]. This power-law relationship  
43 is thought to derive at least in part from the hierarchical organization of language, and has been variously  
44 attributed to human language syntax [5], semantics [3], and discourse structure [4]. To understand the link  
45 between hierarchical organization in language and a power-law decay in sequential dependencies, it is helpful  
46 to consider both the latent and surface structure of a sequence (Fig. 1). When only the surface structure  
47 of a sequence is available, as it is for language corpora, a power-law decay in the MI between sequence  
48 elements gives evidence of an underlying hierarchical latent structure. This phenomenon can be demonstrated  
49 by comparing the MI between elements in a sequence generated from a hierarchically-structured language  
50 model, such as a probabilistic context-free grammar (PCFG), to the MI between elements in a sequence  
51 generated by a non-hierarchical model, such as a Markov process (Fig. 1). For sequences generated by a  
52 Markov process, the strength of the relationship between elements decays exponentially (Eq. 5) as sequential  
53 distance increases [5, 21] (Fig. 1A). In the PCFG model, however, linear distances in the sequence are coupled  
54 to logarithmic distances in the latent structure of the hierarchy (Fig. 1B-C). While information continues to  
55 decay exponentially as a function of the distance in the latent hierarchy (Fig. 1D), this log-scaling results  
56 in a power-law decay when MI is computed over corresponding sequential distances (Fig. 1E).

57 In language, long-range relationships convey meaning across hierarchical levels of organization. This latent  
58 linguistic structure is thought to underlie the power-law relationships observed across texts and speech [2–5].  
59 The presence of power-law sequential and temporal relationships in natural phenomena is not restricted  
60 to human language, however. Here, we demonstrate that the power law underlying long-range statistical  
61 relationships in human speech precedes complex morphosyntactic production in language and is part of a  
62 larger set of natural behaviors exhibiting similar temporal relationships. The potentially numerous generative  
63 mechanisms for these phenomena remain to be established; however their existence evinces a substrate that  
64 may have been exploited in the evolution of a cognitive capacity to represent long-range signals prior to the  
65 evolution of language.

66 Beyond language, power-law temporal relationships are observed in both human-unique behaviors like music  
67 production [22] and stock market turbulence [23, 24] as well as behaviors that are shared with other animals  
68 such as sleep patterns in infants [25] and heart rates in healthy adults [26, 27]. In fact, the ubiquity of  
69 power laws in the physical and biological sciences spreads beyond temporal and sequential relationships  
70 and is well documented across a variety of phenomena.  $1/f$  noise, a power law in the spectral density of  
71 a stochastic process, is observed in signals ranging from neural oscillations to flocking patterns in birds  
72 [28–31]. The relationship between biological variables often scale following a power law, for example, the  
73 allometric scaling laws observed between an organisms size and metabolic rate [32]. A variety of natural  
74 distributions such as word frequencies are well described by power-law distributions, a phenomenon termed  
75 Zipf’s law [33–37]. Power-law distributions are also observed in the connectivity of many biological and social  
76 networks, a property called scale-freeness [38–41]. Over much of the past several decades, heated debates  
77 have arisen over claims of universal organizing principles of natural phenomena characterized by power laws  
78 [28, 31, 34, 41–44].

79 Across the diverse phenomena described by power-law relationships in the natural sciences, one commonality  
80 is that the origins of the observed power law are still not fully understood and mechanistic implications  
81 of power laws are often overstated [28, 31, 34, 41, 43, 44]. Although mechanisms have been proposed to

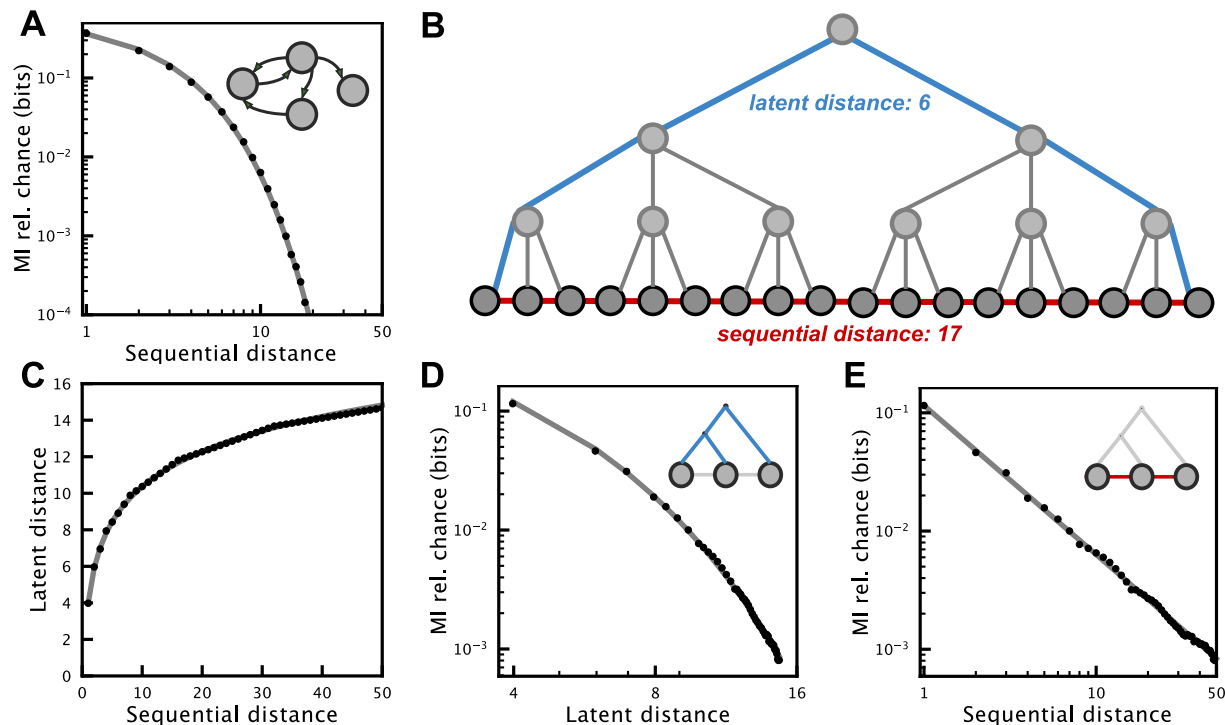

Figure 1: Comparison between sequences with deep latent relationships and iteratively generated sequences. (A) The MI between elements in an iteratively (Markov model) generated sequence decays exponentially as a function of sequential distance. (B) An example sequence with hierarchical latent structure. The latent distance between the two end elements in the sequence is 6 (blue), while the sequential distance is 17 (red). (C) In sequences with hierarchical latent structure, the sequential distance between elements is logarithmically related to the latent distance (fit model:  $a * \log_{x*b} + c$  where  $x$  is sequential distance). (D) Like sequential distance in (A), The MI between elements in a hierarchically generated sequence decays exponentially as a function of latent distance. (E) The MI between elements in a hierarchically generated sequence decays following a power law as a function of sequential distance, which is related to the exponential MI decay seen in (D) and the logarithmic relationship between sequential and latent distance seen in (C). In (A), the probabilistic Markov model used to generate the empirical data has 2 states with a self-transition probability of 0.1. In (C-E) a probabilistic context-free grammar [5] with the same transition probability is used.

82 account for the various forms of power laws observed in natural phenomena, the presence alone of a power  
 83 law provides little insight into the underlying generative mechanism [31, 34, 42–44]. This is true of language  
 84 as well. While the power laws characterized in language are consistent with generative mechanisms posited  
 85 in syntactic theory [5, 45], they are not confirmatory. The presence of a power law in language does confirm,  
 86 however, that relationships spanning long distances exist in the signal. Given the presence of power-law  
 87 sequential relationships in human language, the question remains whether the power law is a product of  
 88 linguistic structure, or whether these relationships originate in lower-level phenomena that are not unique  
 89 to human language. If long-range relationships predate the evolution of language, they may have influenced  
 90 the structure of temporal relationships that evolved with language.

91 Beyond human language, numerous other human behaviors [46–51], animal behaviors [52–57], animal vo-  
 92 calizations [37, 58–66], and other biologically-generated processes [25–27, 31, 67–70] have been described as  
 93 being hierarchically organized or display long-timescale organization. Such behaviors range from the seem-  
 94 ingly non-complex patterns of behavior exhibited by fruit flies [52, 56] to tool usage in great apes [53, 54]. For  
 95 this reason, it has been argued that hierarchical organization is an inherent property of biological processes,  
 96 including human behavior [50, 71, 72] and that the hierarchical structure of behavior is inherited from the  
 97 lower-level organization of neurophysiological mechanisms that produce it [73–76], which themselves can be  
 98 characterized by power-law relationships in temporal sequencing [29, 30, 77]. The developmental and/or evo-

99 lutionary dependence of linguistic structure on underlying, domain-general, cognitive and neural processes  
100 has been posited by several researchers [50, 51, 76, 78].

101 Despite the numerous observations of hierarchical structure and long-range dependencies in non-human  
102 animal behaviors, few studies have examined the statistical dynamics of these behaviors quantitatively.  
103 Those that do have found power-law dynamics in the communication and behaviors of animals that are  
104 phylogenetically distant from humans [2, 79–81]. This, along with the prevalence of long-range power-law  
105 relationships in other natural phenomena [28, 31], supports the generality of these organizing principles  
106 across all behaviors. On the other hand, sequential organization in the vocal communication signals of non-  
107 human primates may extend over only a few elements [82, 83], and descriptions of hierarchical non-vocal  
108 behaviors in non-human primates tend to only be a few elements long [53, 54, 84], supporting at most a very  
109 shallow hierarchical structure. Thus, the extent to which a power-law decay provides a unified description  
110 of long-range statistical dependencies in behavior has yet to be determined. This question has particular  
111 relevance to human language, where it is unknown whether power-law relationships in sequential organization  
112 are present throughout language development, or emerge as linguistic structure develops. Understanding the  
113 ubiquity of power-law relationships across non-linguistic and non-human behavior, as well as across human  
114 language acquisition, may help to explain the origins of this organizing principle in language.

## 115 2.1 Present work

116 In the present work, we perform three groups of analyses exploring whether non-linguistic and pre-linguistic  
117 long-range statistical relationships parallel the long-range statistical relationships present in adult language.  
118 First, we analyze a series of language development corpora of children learning English, starting at six months  
119 of age [85–98], to determine whether long-range relationships are present in human vocalizations prior to  
120 the production of hierarchically-organized linguistic structure. Second, we analyze the long-range statistical  
121 dependencies of a human non-linguistic corpus of transcribed actions taken by humans while cooking [99],  
122 to determine whether power-law relationships are present in the sequential organization of non-linguistic  
123 human behaviors. Finally, we analyze the long-range sequential relationships in datasets of freely moving  
124 fruit flies (*Drosophila melanogaster*) [56] and zebrafish (*Danio rerio*) behavior [100], both of which have been  
125 previously characterized as being hierarchically organized, to determine whether a power law is present in  
126 the sequential organization of non-human non-linguistic behavior.

127 We show that both human non-linguistic and non-human non-linguistic behavior exhibits long-range power-  
128 law statistical dependencies like those observed in mature human language. In child language datasets, we  
129 observe a power-law as early as 6 to 12 months of age, while children are still in the "babbling" stage of  
130 language development. In the animal behavior datasets, we observe long-range power-law decays spanning  
131 many minutes (>6 minutes in *Drosophila* and >20 minutes in zebrafish).

## 132 3 Results

### 133 3.1 Language acquisition

134 Although much work has explored the information content and long-range sequential organization of human  
135 language, relatively few studies have examined these properties in speech [2] or language development directly.  
136 Here we investigate the long-range information present in speech during language development using datasets  
137 from the TalkBank project [85, 86].

138 We first examined MI decay in sequences of words over nine datasets of natural speech from English speaking  
139 children included in the CHILDES repository [86, 91–98] and three datasets of sequences of phonemes from  
140 the PhonBank repository [85, 87–89], both of which are part of the TalkBank repository [86]. Each dataset  
141 within CHILDES and PhonBank was collected in a slightly different manner. In our analyses, we included  
142 only transcripts of spontaneous speech that were collected from typically-developing children (usually at  
143 an in-home setting with family or an experimenter). The subset of CHILDES we used includes word-level  
144 transcripts of speech from children aged 12 months to 12 years of age. The subset of PhonBank we used  
145 includes phonetic transcriptions of speech given in the International Phonetic Alphabet (IPA) from children  
146 aged 6 months to four years of age. Between the phoneme and word-level datasets, a large range of speech  
147 and language development is covered.

148 For the MI analysis on phonemes, we binned transcripts into five 6-month age groups (6-12, 12-18, 18-  
149 24, 24-30, 30-36) and one age group from 3 years to 4 years. Each transcript was analyzed as sequences of  
150 phonemes, where phoneme distributions for each transcript are treated independently to account for variation



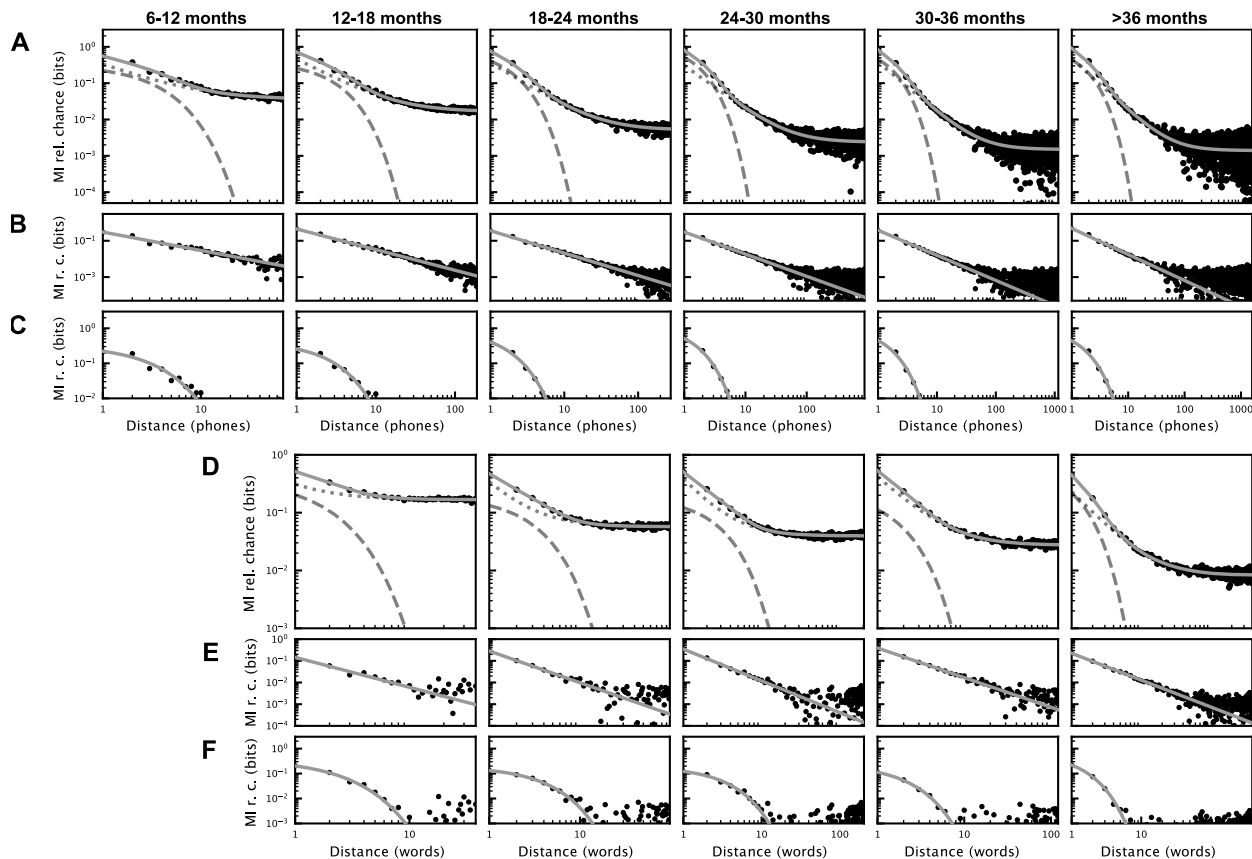

Figure 2: Mutual Information decay over words and phonemes during development. (A) MI decay over phonemes for each age group. MI decay is best fit by a composite model (solid grey line) for all age groups across phonemes and words. Exponential and power-law decays are shown as a dashed and dotted grey lines, respectively. (B) The MI decay (as in (A)) with the exponential component of the fit model subtracted to show the power-law component of the decay. (C) The same as in (B), but with the power-law component subtracted to show exponential component of the decay. (D-F) The same analyses as A-C, but for words.

151 in acquired vocabulary across individuals during development. Because transcript lengths varied between  
 152 age groups (Fig. S1), we analyzed MI at sequential distances up to the median transcript length for each  
 153 age group. Across all age groups, the decay in MI over sequences of phonemes is best fit by a composite  
 154 power-law and exponential decay model (Fig. 2A-C; relative probabilities 0.897 to  $>0.999$ ; Table S2). In  
 155 each age group, we observe both a clear power law prominent over long distances (Fig. 2B) and a clear  
 156 exponential decay at short word distances (Fig. 2C), consistent with prior results on adult speech [2].

157 For the MI analysis on words, we binned transcripts into four 6-month age groups (12-18, 18-24, 24-30, 30-36)  
 158 and one age group from 3 years to 12 years. The MI decay between words is best fit by a composite model  
 159 of power-law and exponential decay (Eq. 7; relative probability = 0.989 for 12-18 months and  $> 0.999$  for  
 160 all other age groups; Fig. 2D-F; Table S1).

161 We also computed the MI decay over control sequences of words and phonemes that had been shuffled to  
 162 isolate sequential relationships at different levels of organization (e.g. phoneme, word, utterance, transcript;  
 163 Figs. S2, S3, S4). Consistent with Sainburg et al., [2], we observe that short-range relationships captured by  
 164 exponential decay are largely carried within words and utterances, while long-range relationships captured  
 165 by a power-law decay are carried across longer timescales between words and utterances. In particular,  
 166 long-range relationships are eliminated when between-utterance structure is removed by randomly shuffling  
 167 the order of utterances within a transcript (Figs. S2E, S3C) and retained when within-utterance structure  
 168 is removed by shuffling words or phonemes within utterances (Figs. S2D, S3B) or phonemes within words  
 169 (Fig. S2C). When MI decay is computed over part-of-speech labels for the words in CHILDES, we find

170 a transition from MI decay that is best fit by a power-law decay alone at 12-24 months of age, to MI  
171 decay that is best fit by a composite model of power-law and exponential decay after 24 months (Fig  
172 S3D). Shuffling word order eliminates all long-range sequential relationships while preserving short timescale  
173 exponential relationships (Figs. S2B, S3E), and shuffling phoneme order within transcripts removes all  
174 sequential relationships (Figs. S2F). Across each shuffling analysis, we observe that short-range information  
175 content captured by exponential decay is largely captured within words and utterances, while long-range  
176 information is carried between utterances, even during early language production.

177 As an additional control to ensure that the observed MI decay patterns are not the product of mixing datasets  
178 from multiple individuals, we also computed the MI decay of the longest individual transcripts comprising  
179 each age cohort across both phonemes and words. The decay of the longest individual transcripts parallels  
180 the results across transcripts from Fig. 2 (Figs. S5, S6).

### 181 3.2 Human behavior

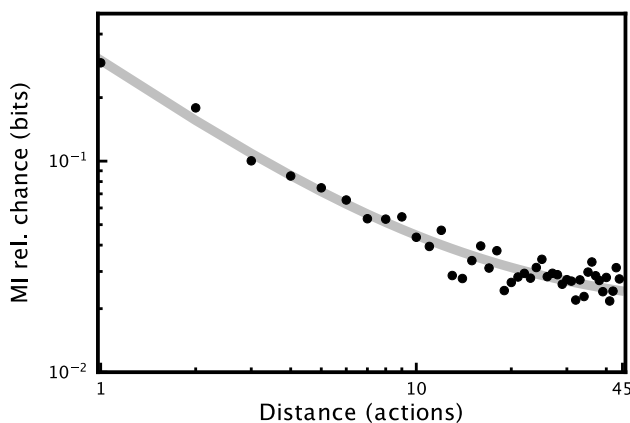

Figure 3: Mutual Information decay over actions in the Epic Kitchens dataset [99]. Data is fit by a power-law decay model (Eq. 6).

182 To contrast the long-range statistical structure of human language with non-linguistic human behaviors, we  
183 require a relatively large dataset of long, discrete, sequences of behavior. We chose the Epic Kitchens dataset  
184 [99], as it was the largest available segmented dataset of long sequences of individual actions, and because  
185 cooking has previously been described as having complex hierarchical syntactic structure [101].

186 The Epic Kitchens dataset consists of a series of videos in which each section of the video is labeled with an  
187 action and noun, for example *open door* → *turn-on light* → *close door* → *open fridge* → ... We calculate  
188 MI only over the sequences of verb classes, of which there are 119 unique classes. We computed the MI up  
189 to a distance of the median sequence length of 45 actions.

190 In contrast with the speech datasets, we found that the Epic Kitchens dataset was best fit by a power-law  
191 decay model with no exponential component (Eq. 6; Fig. 3; relative probability = 0.597; Table S3). We  
192 additionally looked at the MI decay of the longest cooking transcripts and found the MI decay of individual  
193 sequences were similar to MI decay across the entire dataset (Fig S7).

### 194 3.3 Animal behavior

195 The datasets of animal behavior used in our analyses were videos of zebrafish [100] and *Drosophila* [56] move-  
196 ments that had been transcribed in an unsupervised manner, i.e without external reference to *a priori* state  
197 labels. In both datasets, raw data recorded from individual animals were projected into a low-dimensional  
198 space and were then clustered into discrete states. These states were then labelled *post hoc* with human-  
199 interpretable descriptions such as "slow", "side leg", or "anterior" for *Drosophila*, and "O-bend" or "J-turn"  
200 for zebrafish. *Drosophila* behavior has a long history of being described in hierarchical terms [52, 56, 102],  
201 and the dataset used here, in particular, demonstrates long-range relationships extending over hundreds to  
202 thousands of states [56]. The zebrafish dataset used here has also previously been shown to contain sequen-  
203 tial information that unfolds over multiple timescales [100, 103]. Both datasets were chosen because they  
204 contain large sets of discrete behaviors from individuals over long periods of time.

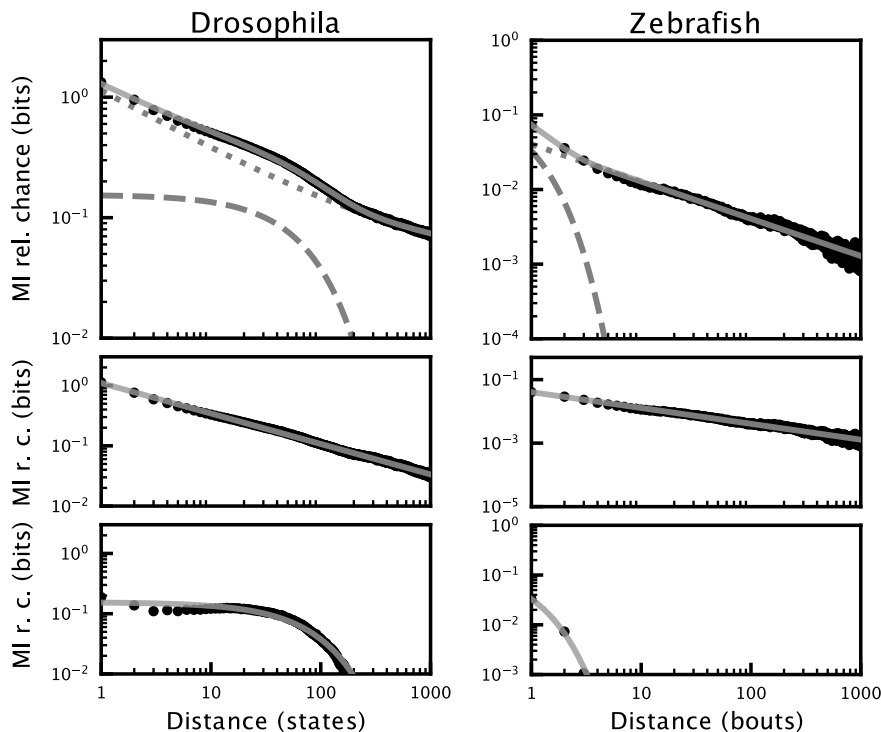

Figure 4: Mutual Information decay over Zebrafish and *Drosophila* behavior. Data is displayed in the same manner as Fig. 2.

205 In both the zebrafish and *Drosophila* datasets, we observe an MI decay that is best fit by a composite  
 206 power-law and exponential decay model (Fig. 4; relative probabilities > 0.999; Table S3). The shape of  
 207 the MI decay differs somewhat between the two datasets, however. In the case of the zebrafish, the relative  
 208 contributions of the exponential and power-law components of the decay mirror the results obtained in  
 209 speech. That is, an exponential component to the decay is observed at short distances under 10 elements,  
 210 which gives way to a power-law at longer distances. In the case of the *Drosophila*, the power-law component  
 211 of the decay is dominant throughout the signal, and the exponential component of the decay only captures  
 212 a small portion of the variance at a distance of around 10-200 elements.

213 We additionally looked at a subset of the longest individual transcripts of *Drosophila* (Fig. S8) and zebrafish  
 214 (Fig. S9) behavior and found that MI decay at the individual level varies between individual transcripts but  
 215 matches the long-range decay observed across the datasets.

## 216 4 Discussion

217 We analyzed the long-range sequential information present in language production during development, and  
 218 several sequentially organized and putatively hierarchical non-linguistic behaviors in other species. In all  
 219 cases, the information between behavioral elements decays following a power law as sequential distance in-  
 220 creases. For language, we find that that the long-range statistical relationships characteristic of adult usage  
 221 [2] are present as early as 6 to 12 months in phonemes and 12-18 months in words, preceding the production  
 222 of complex linguistic structure [84]. We see similar long-range power-law structure in the sequential organi-  
 223 zation of human food preparation and cooking. Cooking is a relatively modern and human-unique behavior  
 224 [104], however, and may have arisen after humans developed more deeply hierarchical and highly planned  
 225 tool usage behaviors [84, 105]. Yet, we also observe similar long-range organization in the movement pat-  
 226 terns of *Drosophila* and zebrafish, consistent with previous reports for birdsong [2]. Long-range statistical  
 227 relationships are present developmentally in speech before hierarchical linguistic structures are produced,  
 228 and exist in widely varying animal species. Thus, the long-range statistical relationships present in language  
 229 are not unique to linguistic behaviors or to humans.

230 These results compel reconsideration of the mechanisms that shape long-range statistical relationships in  
231 human language. Traditionally, the power-law decay in information between the elements of language  
232 (phonemes, words, etc.) has been thought to be imposed by the hierarchical linguistic structure of syn-  
233 tax, semantics, and discourse [3–5]. Early development provides a natural experiment in which one can  
234 examine human vocal communication absent the production of complex syntactic and semantic structures.  
235 Remarkably, even at a very early age, prior to the production of mature syntactic structures, vocal sequences  
236 show adult-like long-range dependencies. This does not rule out the possibility that long-range dependencies  
237 in adult language are driven in part by linguistic structure, but this hierarchical organization alone cannot  
238 explain our observations. What seems most reasonable to us, is that multiple mechanisms impose long-range  
239 dependencies on human speech and language, and that these operate on different developmental timescales.  
240 We take our observations of similar power laws in diverse non-linguistic behaviors to reinforce the idea that  
241 multiple mechanisms impose power-law dynamics on behavioral sequences. Indeed, power-laws are found in  
242 natural phenomena as distant from language as the sequential organization of earthquakes [106] and river  
243 water levels [107]. It may be that the power-law structure of human language reflects a very deep embedding  
244 of multiple, hierarchically structured complex systems, at varying levels of abstraction from linguistic, to  
245 motor control, to even more general underlying processes. Understanding the various power-law relationships  
246 in natural phenomena, and their origins, remains an area of active research [28, 31, 42].

247 Regardless of any deeper understanding of underlying mechanisms, our results demonstrate clear patterns  
248 in the information conveyed across time in both linguistic and non-linguistic behaviors. These patterns  
249 exist. Thus, they are potentially available and useful to any cognitive agent that engages with them. For  
250 example, in the movement patterns of a housefly, evolutionary fitness may be conferred to individuals (e.g.  
251 predators or mates) that can better anticipate the behavior of others by integrating long-range statistical  
252 dependencies. For human language, these selective advantages and abilities seem clear, as sensitivity to  
253 long-range organization has obvious benefit for comprehension. Outside of language, evidence for long-range  
254 sensitivities is more sparse, but humans do show scale invariance in retrospective memory tasks [108] and  
255 attention to power-law timescales in anticipation of future events in cognitive tasks [109]. The extent to  
256 which non-human animals are sensitive to the long-range dynamics (power-law or otherwise) of information  
257 in the environment is unknown. If non-human animals can model the long-range statistical dependencies  
258 present in their environment, this capacity would constitute a component of the broad faculty of language  
259 [110], that is, a necessary, but not uniquely-human, component of language. The presence of long-range  
260 statistical dependencies in non-linguistic behaviors and a generalized perceptual sensitivity to them would  
261 provide a scaffold on which language could evolve, and where hierarchical syntax and semantics can be  
262 understood as later additions that exploit existing long-range structures and sensitivities. We refer to this  
263 idea as the Statistical Scaffolding Hypothesis.

## 264 5 Methods

### 265 5.1 Mutual information

266 For each dataset, we calculate the sequential MI over the elements of the sequence dataset (e.g. words  
267 produced by a child, actions performed by *Drosophila*). Each element in each sequence is treated as unique to  
268 that transcript to account for different distributions of behaviors across different transcripts within datasets.

269 Given a sequence of discrete elements  $a \rightarrow b \rightarrow c \rightarrow d \rightarrow e$  We calculate mutual information as:

$$I(X, Y) = S(X) + S(Y) - S(X, Y) \quad (1)$$

270 Where  $X$  and  $Y$  are the distributions of single elements at a given distance. For example, at a distance of  
271 two,  $X$  is the distribution  $[a, b, c]$  and  $Y$  is  $[c, d, e]$  from the set of element-pairs  $(a - c, b - d, \text{ and } c - e)$ .  
272  $\hat{S}(X)$  and  $\hat{S}(Y)$  are the marginal entropies of the distributions of  $X$  and  $Y$ , respectively, and  $\hat{S}(X, Y)$  is the  
273 entropy of the joint distribution of  $X$  and  $Y$ .

274 To estimate entropy, we employ the Grassberger [111] method which accounts for under-sampling true entropy  
275 from finite samples:

$$\hat{S} = \log_2(N) - \frac{1}{N} \sum_{i=1}^K N_i \psi(N_i) \quad (2)$$

276 where  $\psi$  is the digamma function,  $K$  is the number of categories of elements (e.g. words or phones) and  $N$   
277 is the total number of elements in each distribution.

278 We then adjust the estimated MI to account for chance. To do so, we subtract a lower bound estimate of  
279 chance MI ( $\hat{I}_{sh}$ ):

$$MI = \hat{I} - \hat{I}_{sh} \quad (3)$$

280 This sets chance MI at zero. We estimate MI at chance ( $\hat{I}_{sh}$ ) by calculating MI on permuted distributions  
281 of labels  $X$  and  $Y$ :

$$\hat{I}_{sh}(X, Y) = \hat{S}(X_{sh}) + \hat{S}(Y_{sh}) + \hat{S}(X_{sh}, Y_{sh}) \quad (4)$$

282  $X_{sh}$  and  $Y_{sh}$  refer to random permutations of the distributions  $X$  and  $Y$  described above. Permuting  $X$   
283 and  $Y$  effects the joint entropy  $S(X_{sh}, Y_{sh})$  in  $I_{sh}$ , but not the marginal entropies  $S(X_{sh})$  and  $S(Y_{sh})$ .  $\hat{I}_{sh}$   
284 is related to the Expected Mutual Information [112–114] which accounts for chance using a hypergeometric  
285 model of randomness.

286 Importantly, MI calculated over a sequence as a function of distance is referred to as a "mutual information  
287 function", to distinguish it as the functional form of mutual information, which measures the dependency  
288 between two random variables [14]. In the mutual information function, samples from the distributions  $X$   
289 and  $Y$  are taken from the same sequence, thus they are not independent. MI as a function of distance acts  
290 as a generalized form of the correlation function that can be computed over symbolic sequences and captures  
291 non-linear relationships [14].

## 292 5.2 Fitting mutual information decay

293 We fit the three following models:

294 An exponential decay model:

$$MI = a * e^{-x*b} + f \quad (5)$$

295 A power-law model:

$$MI = c * x^d + f \quad (6)$$

296 A composite model of the power-law and exponential models:

$$MI = a * e^{-x*b} + c * x^d + f \quad (7)$$

297 where  $x$  represents the inter-element distance between units (e.g. phones or syllables).

298 To fit the model on a logarithmic scale, we computed the residuals between the log of the MI and the log of the  
299 models estimation of the MI. We scaled the residuals during fitting by the log of the distance between elements  
300 to emphasize fitting the decay in log-scale because distance was necessarily sampled linearly as integers.  
301 Models were fit using the lmfit Python package [115] using Nelder-Mead minimization. We compared model  
302 fits on the basis of AICc and report the relative probability of each model fit to the MI decay [2, 116]. The  
303 parameters for each best-fit model for Figs 2, 3, and 4 can be found in Table 4.

## 304 5.3 Shuffling controls

305 The speech datasets are organized hierarchically into transcripts, utterances, words, and phonemes allowing  
306 us to shuffle the dataset at multiple levels of organization. In the Epic Kitchens, *Drosophila*, and zebrafish  
307 datasets no levels of organization were available beyond individual transcripts. To ensure that our MI decay  
308 results are a direct result of the sequential organization of each dataset, we performed a control in each  
309 dataset in which we shuffled behavioral elements within each individual transcript. In each case, the MI  
310 decay is flat confirming that the observed MI decay is a result of sequential organization (Figs S2F, S2E,  
311 S10). To ensure that long-range relationships were not due to trivial repetitions of behaviors, we looked in  
312 each dataset at MI decay over sequences in which repeated elements were removed. Removing repeats does  
313 not qualitatively alter the pattern of long-range relationships between elements (Fig. S4).



## 314 5.4 Data Availability

315 The five datasets can be acquired from the TalkBank repository [86], PhonBank repository [85], Berman et  
316 al. [56], Damen et al., [99], and Marques et al., [100]. We performed analyses over these transcripts without  
317 any modification. Example transcripts for each dataset are displayed in the Supplementary Information.  
318 The distribution of sequence lengths of each dataset is shown in Fig. S1. The code necessary for reproducing  
319 our results is available on GitHub [117].

## 320 5.5 Acknowledgements

321 Work supported by NSF GRF 2017216247 and an Annette Merle-Smith Fellowship to T.S., NIMH training  
322 fellowship T32MH020002 and William Orr Dingwall Dissertation Fellowship to A.M., and NIH DC0164081  
323 and DC018055 to T.Q.G.

## 324 References

- 325 [1] Claude E Shannon. Prediction and entropy of printed english. *Bell system technical journal*, 30(1):50–  
326 64, 1951.
- 327 [2] Tim Sainburg, Brad Theilman, Marvin Thielk, and Timothy Q Gentner. Parallels in the sequential  
328 organization of birdsong and human speech. *Nature communications*, 10, 2019.
- 329 [3] Enrique Alvarez-Lacalle, Beate Dorow, J-P Eckmann, and Elisha Moses. Hierarchical structures induce  
330 long-range dynamical correlations in written texts. *Proceedings of the National Academy of Sciences*,  
331 103(21):7956–7961, 2006.
- 332 [4] Eduardo G Altmann, Giampaolo Cristadoro, and Mirko Degli Esposti. On the origin of long-range  
333 correlations in texts. *Proceedings of the National Academy of Sciences*, 109(29):11582–11587, 2012.
- 334 [5] Henry Lin and Max Tegmark. Critical behavior in physics and probabilistic formal languages. *Entropy*,  
335 19(7):299, 2017.
- 336 [6] Peter Grassberger. Estimating the information content of symbol sequences and efficient codes. *IEEE*  
337 *Transactions on Information Theory*, 35(3):669–675, 1989.
- 338 [7] Alain Schenkel, Jun Zhang, and Yi-Cheng Zhang. Long range correlation in human writings. *Fractals*,  
339 1(01):47–57, 1993.
- 340 [8] Werner Ebeling and Thorsten Pöschel. Entropy and long-range correlations in literary english. *EPL*  
341 (*Europhysics Letters*), 26(4):241, 1994.
- 342 [9] Paolo Allegrini, Paolo Grigolini, and Luigi Palatella. Intermittency and scale-free networks: a dynam-  
343 ical model for human language complexity. *Chaos, Solitons & Fractals*, 20(1):95–105, 2004.
- 344 [10] SS Melnyk, OV Usatenko, VA Yampolskii, and VA Golick. Competition between two kinds of correla-  
345 tions in literary texts. *Physical Review E*, 72(2):026140, 2005.
- 346 [11] Marcelo A Montemurro and Damián H Zanette. Entropic analysis of the role of words in literary texts.  
347 *Advances in complex systems*, 5(01):7–17, 2002.
- 348 [12] Marcelo A Montemurro and Damián H Zanette. Towards the quantification of the semantic information  
349 encoded in written language. *Advances in Complex Systems*, 13(02):135–153, 2010.
- 350 [13] Marcelo A Montemurro and Pedro A Pury. Long-range fractal correlations in literary corpora. *Fractals*,  
351 10(04):451–461, 2002.
- 352 [14] Wentian Li. Mutual information functions versus correlation functions. *Journal of statistical physics*,  
353 60(5-6):823–837, 1990.
- 354 [15] Edwin B. Newman and Louis J. Gerstman. A new method for analyzing printed english. *Journal of*  
355 *experimental psychology*, 44(2):114–125, 08 1952.
- 356 [16] N. G. Burton and C. R. Licklider. Long-range constraints in the statistical structure of printed english.  
357 *American Journal of Psychology*, 68(4):650, Dec 01 1955.
- 358 [17] Edwin B. Newman. The pattern of vowels and consonants in various languages. *The American Journal*  
359 *of Psychology*, 64:369–379, 1951.
- 360 [18] Thomas Cover and Roger King. A convergent gambling estimate of the entropy of english. *IEEE*  
361 *Transactions on Information Theory*, 24(4):413–421, 1978.

- 362 [19] Huitao Shen. Mutual information scaling and expressive power of sequence models. *arXiv preprint*  
363 *arXiv:1905.04271*, 2019.
- 364 [20] Richard Futrell, Kyle Mahowald, and Edward Gibson. Large-scale evidence of dependency length  
365 minimization in 37 languages. *Proceedings of the National Academy of Sciences*, 112(33):10336–10341,  
366 2015.
- 367 [21] Wentian Li. Power spectra of regular languages and cellular automata. *Complex Systems*, 1(1):107–130,  
368 1987.
- 369 [22] Daniel J Levitin, Parag Chordia, and Vinod Menon. Musical rhythm spectra from bach to joplin obey  
370 a  $1/f$  power law. *Proceedings of the National Academy of Sciences*, 109(10):3716–3720, 2012.
- 371 [23] Rosario N Mantegna and H Eugene Stanley. Stock market dynamics and turbulence: parallel analysis  
372 of fluctuation phenomena. *Physica A: Statistical Mechanics and its Applications*, 239(1-3):255–266,  
373 1997.
- 374 [24] Benoit Mandelbrot. The variation of certain speculative prices. *The Journal of Business*, 36(4):394–419,  
375 1963.
- 376 [25] E Canessa and A Calmetta. Physics of a random biological process. *Physical Review E*, 50(1):R47,  
377 1994.
- 378 [26] Masanori Kobayashi and Toshimitsu Musha.  $1/f$  fluctuation of heartbeat period. *IEEE transactions*  
379 *on Biomedical Engineering*, (6):456–457, 1982.
- 380 [27] C-K Peng, J Mietus, JM Hausdorff, Shlomo Havlin, H Eugene Stanley, and Ary L Goldberger. Long-  
381 range anticorrelations and non-gaussian behavior of the heartbeat. *Physical review letters*, 70(9):1343,  
382 1993.
- 383 [28] Miguel A Munoz. Colloquium: Criticality and dynamical scaling in living systems. *Reviews of Modern*  
384 *Physics*, 90(3):031001, 2018.
- 385 [29] Klaus Linkenkaer-Hansen, Vadim V. Nikouline, J. Matias Palva, and Risto J. Ilmoniemi. Long-range  
386 temporal correlations and scaling behavior in human brain oscillations. *The Journal of Neuroscience*,  
387 21(4):1370–1377, February 2001.
- 388 [30] Biyu J He, John M Zempel, Abraham Z Snyder, and Marcus E Raichle. The temporal structures and  
389 functional significance of scale-free brain activity. *Neuron*, 66(3):353–369, 2010.
- 390 [31] T Gisiger. Scale invariance in biology: coincidence or footprint of a universal mechanism? *Biological*  
391 *Reviews*, 76(2):161–209, 2001.
- 392 [32] Geoffrey B West, James H Brown, and Brian J Enquist. A general model for the origin of allometric  
393 scaling laws in biology. *Science*, 276(5309):122–126, 1997.
- 394 [33] Aaron Clauset, Cosma Rohilla Shalizi, and Mark EJ Newman. Power-law distributions in empirical  
395 data. *SIAM review*, 51(4):661–703, 2009.
- 396 [34] Mark EJ Newman. Power laws, pareto distributions and zipf’s law. *Contemporary physics*, 46(5):323–  
397 351, 2005.
- 398 [35] Ramon Ferrer i Cancho and Ricard V Solé. Least effort and the origins of scaling in human language.  
399 *Proceedings of the National Academy of Sciences*, 100(3):788–791, 2003.
- 400 [36] Ryuji Suzuki, John R Buck, and Peter L Tyack. The use of zipf’s law in animal communication analysis.  
401 *Animal Behaviour*, 69(1):F9–F17, 2005.
- 402 [37] Ramon Ferrer-i Cancho and Brenda McCowan. The span of correlations in dolphin whistle sequences.  
403 *Journal of Statistical Mechanics: Theory and Experiment*, 2012(06):P06002, 2012.
- 404 [38] Anna D Broido and Aaron Clauset. Scale-free networks are rare. *Nature communications*, 10(1):1–10,  
405 2019.
- 406 [39] Albert-László Barabási. Scale-free networks: a decade and beyond. *science*, 325(5939):412–413, 2009.
- 407 [40] John C Doyle, David L Alderson, Lun Li, Steven Low, Matthew Roughan, Stanislav Shalunov, Reiko  
408 Tanaka, and Walter Willinger. The robust yet fragile nature of the internet. *Proceedings of the National*  
409 *Academy of Sciences*, 102(41):14497–14502, 2005.
- 410 [41] Evelyn Fox Keller. Revisiting scale-free networks. *BioEssays*, 27(10):1060–1068, 2005.
- 411 [42] Wentian Li. Expansion-modification systems: a model for spatial  $1/f$  spectra. *Physical Review A*,  
412 43(10):5240, 1991.

- 413 [43] Michael PH Stumpf and Mason A Porter. Critical truths about power laws. *Science*, 335(6069):665–666,  
414 2012.
- 415 [44] Guido Boffetta, Vincenzo Carbone, Paolo Giuliani, Pierluigi Veltri, and Angelo Vulpiani. Power laws  
416 in solar flares: self-organized criticality or turbulence? *Physical review letters*, 83(22):4662, 1999.
- 417 [45] Noam Chomsky. On certain formal properties of grammars. *Information and control*, 2(2):137–167,  
418 1959.
- 419 [46] Richard Cooper and Tim Shallice. Contention scheduling and the control of routine activities. *Cognitive*  
420 *neuropsychology*, 17(4):297–338, 2000.
- 421 [47] W Tecumseh Fitch and Mauricio D Martins. Hierarchical processing in music, language, and action:  
422 Lashley revisited. *Annals of the New York Academy of Sciences*, 1316(1):87–104, 2014.
- 423 [48] Andrew Whiten, Emma Flynn, Katy Brown, and Tanya Lee. Imitation of hierarchical action structure  
424 by young children. *Developmental science*, 9(6):574–582, 2006.
- 425 [49] Matthew M Botvinick. Hierarchical models of behavior and prefrontal function. *Trends in cognitive*  
426 *sciences*, 12(5):201–208, 2008.
- 427 [50] Karl Spencer Lashley. *The problem of serial order in behavior*, volume 21. Bobbs-Merrill, 1951.
- 428 [51] Valeri Aleksandrovich Kozhevnikov and Liudmila Andreevna Chistovich. Speech: Articulation and  
429 perception. 1965.
- 430 [52] Marian Dawkins and Richard Dawkins. Hierarchical organization and postural facilitation: Rules for  
431 grooming in flies. *Animal Behaviour*, 24(4):739–755, 1976.
- 432 [53] Jill D Pruettz and Paco Bertolani. Savanna chimpanzees, pan troglodytes verus, hunt with tools.  
433 *Current biology*, 17(5):412–417, 2007.
- 434 [54] Richard W Byrne and Jennifer ME Byrne. Complex leaf-gathering skills of mountain gorillas (gorilla  
435 g. beringei): variability and standardization. *American Journal of Primatology*, 31(4):241–261, 1993.
- 436 [55] Louis Lefebvre. Grooming in crickets: timing and hierarchical organization. *Animal Behaviour*,  
437 29(4):973–984, 1981.
- 438 [56] Gordon J Berman, William Bialek, and Joshua W Shaevitz. Predictability and hierarchy in drosophila  
439 behavior. *Proceedings of the National Academy of Sciences*, 113(42):11943–11948, 2016.
- 440 [57] Louis Lefebvre. The organization of grooming in budgerigars. *Behavioural processes*, 7(2):93–106, 1982.
- 441 [58] Arik Kershenbaum, Ann E Bowles, Todd M Freeberg, Dezhe Z Jin, Adriano R Lameira, and Kirsten  
442 Bohn. Animal vocal sequences: not the Markov chains we thought they were. *Proceedings of the Royal*  
443 *Society of London B: Biological Sciences*, 281(1792):20141370, 2014.
- 444 [59] Tina C Roeske, Damian Kelty-Stephen, and Sebastian Wallot. Multifractal analysis reveals music-like  
445 dynamic structure in songbird rhythms. *Scientific Reports*, 8(1):4570, 2018.
- 446 [60] Jeffrey E Markowitz, Elizabeth Ivie, Laura Kligler, and Timothy J Gardner. Long-range order in  
447 canary song. *PLoS Computational Biology*, 9(5):e1003052, 2013.
- 448 [61] Richard W Hedley. Composition and sequential organization of song repertoires in Cassin’s vireo (*Vireo*  
449 *cassinii*). *Journal of Ornithology*, 157(1):13–22, 2016.
- 450 [62] Kazutoshi Sasahara, Martin L Cody, David Cohen, and Charles E Taylor. Structural design principles  
451 of complex bird songs: a network-based approach. *PLoS One*, 7(9):e44436, 2012.
- 452 [63] Ryuji Suzuki, John R Buck, and Peter L Tyack. Information entropy of humpback whale songs. *The*  
453 *Journal of the Acoustical Society of America*, 119(3):1849–1866, 2006.
- 454 [64] Xinjian Jiang, Tenghai Long, Weicong Cao, Junru Li, Stanislas Dehaene, and Liping Wang. Production  
455 of supra-regular spatial sequences by macaque monkeys. *Current Biology*, 28(12):1851–1859, 2018.
- 456 [65] Julia Hyland Bruno and Ofer Tchernichovski. Regularities in zebra finch song beyond the repeated  
457 motif. *Behavioural Processes*, 2017.
- 458 [66] Takashi Morita, Hiroki Koda, Kazuo Okanoya, and Ryosuke O Tachibana. Measuring long context  
459 dependency in birdsong using an artificial neural network with a long-lasting working memory. *bioRxiv*,  
460 2020.
- 461 [67] H Eugene Stanley, Viktor Afanasyev, Luis A Nunes Amaral, SV Buldyrev, AL Goldberger, Steve  
462 Havlin, Harry Leschhorn, P Maass, Rosario N Mantegna, C-K Peng, et al. Anomalous fluctuations in  
463 the dynamics of complex systems: from dna and physiology to econophysics. *Physica A: Statistical*  
464 *Mechanics and its Applications*, 224(1-2):302–321, 1996.

- 465 [68] Wentian Li and Kunihiro Kaneko. Long-range correlation and partial  $1/f\alpha$  spectrum in a noncoding  
466 dna sequence. *EPL (Europhysics Letters)*, 17(7):655, 1992.
- 467 [69] C-K Peng, Sergej V Buldyrev, Ary L Goldberger, Shlomo Havlin, Francesco Sciortino, Michael Simons,  
468 and HE Stanley. Long-range correlations in nucleotide sequences. *Nature*, 356(6365):168, 1992.
- 469 [70] Gandhimohan M Viswanathan, V Afanasyev, SV Buldyrev, EJ Murphy, PA Prince, and H Eugene  
470 Stanley. Lévy flight search patterns of wandering albatrosses. *Nature*, 381(6581):413, 1996.
- 471 [71] Richard Dawkins. Hierarchical organisation: A candidate principle for ethology. 1976.
- 472 [72] Herbert A Simon. The architecture of complexity. In *Facets of systems science*, pages 457–476. Springer,  
473 1991.
- 474 [73] Dietmar Todt and Henrike Hultsch. How songbirds deal with large amounts of serial information:  
475 retrieval rules suggest a hierarchical song memory. *Biological cybernetics*, 79(6):487–500, 1998.
- 476 [74] Etienne Koechlin, Chrystele Ody, and Frédérique Kouneiher. The architecture of cognitive control in  
477 the human prefrontal cortex. *Science*, 302(5648):1181–1185, 2003.
- 478 [75] Matthew M Botvinick, Yael Niv, and Andrew C Barto. Hierarchically organized behavior and its  
479 neural foundations: A reinforcement learning perspective. *Cognition*, 113(3):262–280, 2009.
- 480 [76] Michael T Ullman. A neurocognitive perspective on language: The declarative/procedural model.  
481 *Nature reviews neuroscience*, 2(10):717–726, 2001.
- 482 [77] J Matias Palva, Alexander Zhigalov, Jonni Hirvonen, Onerva Korhonen, Klaus Linkenkaer-Hansen, and  
483 Satu Palva. Neuronal long-range temporal correlations and avalanche dynamics are correlated with  
484 behavioral scaling laws. *Proceedings of the National Academy of Sciences*, 110(9):3585–3590, 2013.
- 485 [78] Morten H Christiansen and Nick Chater. Language as shaped by the brain. *Behavioral and brain  
486 sciences*, 31(5):489–509, 2008.
- 487 [79] Shouwen Ma, Andries Ter Maat, and Manfred Gahr. Power-law scaling of calling dynamics in zebra  
488 finches. *Scientific reports*, 7(1):8397, 2017.
- 489 [80] G. M. Viswanathan, V. Afanasyev, S. V. Buldyrev, E. J. Murphy, P. A. Prince, and H. E. Stanley.  
490 Lévy flight search patterns of wandering albatrosses. *Nature*, 381(6581):413–415, May 1996.
- 491 [81] Luiz G. A. Alves, Peter B. Winter, Leonardo N. Ferreira, Renée M. Briellmann, Richard I. Morimoto,  
492 and Luís A. N. Amaral. Long-range correlations and fractal dynamics in *c. elegans* : Changes with  
493 aging and stress. *Physical Review E*, 96(2), August 2017.
- 494 [82] Christopher I Petkov and Erich Jarvis. Birds, primates, and spoken language origins: behavioral  
495 phenotypes and neurobiological substrates. *Frontiers in evolutionary neuroscience*, 4:12, 2012.
- 496 [83] Christopher I Petkov and Benjamin Wilson. On the pursuit of the brain network for proto-syntactic  
497 learning in non-human primates: conceptual issues and neurobiological hypotheses. *Philosophical  
498 Transactions of the Royal Society B: Biological Sciences*, 367(1598):2077–2088, 2012.
- 499 [84] Patricia M Greenfield. Language, tools and brain: The ontogeny and phylogeny of hierarchically  
500 organized sequential behavior. *Behavioral and brain sciences*, 14(4):531–551, 1991.
- 501 [85] Yvan Rose and Brian MacWhinney. The phonbank project: Data and software-assisted methods for  
502 the study of phonology and phonological development. 2014.
- 503 [86] Brian MacWhinney. The childes project: Tools for analyzing talk: Volume i: Transcription format  
504 and programs, volume ii: The database, 2000.
- 505 [87] Barbara L Davis and Peter F MacNeilage. The articulatory basis of babbling. *Journal of Speech,  
506 Language, and Hearing Research*, 38(6):1199–1211, 1995.
- 507 [88] Jennifer M Parsons. *Positional effects in phonological development: a case study*. PhD thesis, Memorial  
508 University of Newfoundland, 2006.
- 509 [89] Jae Yung Song, Katherine Demuth, Karen Evans, and Stefanie Shattuck-Hufnagel. Durational cues to  
510 fricative codas in 2-year-olds’ american english: Voicing and morphemic factors. *The Journal of the  
511 Acoustical Society of America*, 133(5):2931–2946, 2013.
- 512 [90] Roger Brown. *A first language: The early stages*. Harvard U. Press, 1973.
- 513 [91] Edward C Carterette and Margaret Hubbard Jones. *Informal speech: Alphabetic & phonemic texts  
514 with statistical analyses and tables*. Univ of California Press, 1974.



- 515 [92] Susan R Braunwald. Mother-child communication: the function of maternal-language input. *Word*,  
516 27(1-3):28–50, 1971.
- 517 [93] Marty J Demetras, Kathryn Nolan Post, and Catherine E Snow. Feedback to first language learners:  
518 The role of repetitions and clarification questions. *Journal of child language*, 13(2):275–292, 1986.
- 519 [94] Elise F Masur and Jean B Gleason. Parent–child interaction and the acquisition of lexical information  
520 during play. *Developmental Psychology*, 16(5):404, 1980.
- 521 [95] Ernst Moerk. Factors of style and personality. *Journal of psycholinguistic research*, 1(3):257–268, 1972.
- 522 [96] Ronald Bradley Gillam and Nils A Pearson. *TNL: test of narrative language*. Pro-ed Austin, TX, 2004.
- 523 [97] Maura Jones Moyle, Susan Ellis Weismer, Julia L Evans, and Mary J Lindstrom. Longitudinal rela-  
524 tionships between lexical and grammatical development in typical and late-talking children. *Journal*  
525 *of Speech, Language, and Hearing Research*, 2007.
- 526 [98] Johanna G Nicholas and Ann E Geers. Communication of oral deaf and normally hearing children at  
527 36 months of age. *Journal of Speech, Language, and Hearing Research*, 40(6):1314–1327, 1997.
- 528 [99] Dima Damen, Hazel Doughty, Giovanni Maria Farinella, Sanja Fidler, Antonino Furnari, Evangelos  
529 Kazakos, Davide Moltisanti, Jonathan Munro, Toby Perrett, Will Price, and Michael Wray. Scaling  
530 egocentric vision: The epic-kitchens dataset. In *European Conference on Computer Vision (ECCV)*,  
531 2018.
- 532 [100] João C Marques, Simone Lackner, Rita Félix, and Michael B Orger. Structure of the zebrafish lo-  
533 comotor repertoire revealed with unsupervised behavioral clustering. *Current Biology*, 28(2):181–195,  
534 2018.
- 535 [101] Hilde Kuehne, Ali Arslan, and Thomas Serre. The language of actions: Recovering the syntax and  
536 semantics of goal-directed human activities. In *Proceedings of the IEEE conference on computer vision*  
537 *and pattern recognition*, pages 780–787, 2014.
- 538 [102] Andrew M Seeds, Primoz Ravbar, Phuong Chung, Stefanie Hampel, Frank M Midgley Jr, Brett D  
539 Mensh, and Julie H Simpson. A suppression hierarchy among competing motor programs drives  
540 sequential grooming in drosophila. *Elife*, 3:e02951, 2014.
- 541 [103] Marcus Ghosh and Jason Rihel. Hierarchical compression reveals sub-second to day-long structure in  
542 larval zebrafish behaviour. *bioRxiv*, page 694471, 2019.
- 543 [104] Richard Wrangham. *Catching fire: how cooking made us human*. Basic Books, 2009.
- 544 [105] Dietrich Stout, Thierry Chaminade, Andreas Thomik, Jan Apel, and A Aldo Faisal. Grammars of  
545 action in human behavior and evolution. *bioRxiv*, page 281543, 2018.
- 546 [106] Kim Christensen, Leon Danon, Tim Scanlon, and Per Bak. Unified scaling law for earthquakes. *Pro-*  
547 *ceedings of the National Academy of Sciences*, 99(suppl 1):2509–2513, 2002.
- 548 [107] M Sadegh Movahed and Evalds Hermanis. Fractal analysis of river flow fluctuations. *Physica A:*  
549 *Statistical Mechanics and its Applications*, 387(4):915–932, 2008.
- 550 [108] Elizabeth A Maylor, Nick Chater, and Gordon DA Brown. Scale invariance in the retrieval of retro-  
551 spective and prospective memories. *Psychonomic Bulletin & Review*, 8(1):162–167, 2001.
- 552 [109] Damian G Stephen, Nigel Stepp, James A Dixon, and MT Turvey. Strong anticipation: Sensitiv-  
553 ity to long-range correlations in synchronization behavior. *Physica A: Statistical Mechanics and its*  
554 *Applications*, 387(21):5271–5278, 2008.
- 555 [110] Marc D Hauser, Noam Chomsky, and W Tecumseh Fitch. The faculty of language: what is it, who  
556 has it, and how did it evolve? *Science*, 298(5598):1569–1579, 2002.
- 557 [111] Peter Grassberger. Entropy estimates from insufficient samplings. *arXiv preprint physics/0307138*,  
558 2003.
- 559 [112] Nguyen Xuan Vinh, Julien Epps, and James Bailey. Information theoretic measures for clusterings com-  
560 parison: Variants, properties, normalization and correction for chance. *Journal of Machine Learning*  
561 *Research*, 11(Oct):2837–2854, 2010.
- 562 [113] Lawrence Hubert and Phipps Arabie. Comparing partitions. *Journal of classification*, 2(1):193–218,  
563 1985.
- 564 [114] Nguyen Xuan Vinh, Julien Epps, and James Bailey. Information theoretic measures for clusterings  
565 comparison: is a correction for chance necessary? In *Proceedings of the 26th annual international*  
566 *conference on machine learning*, pages 1073–1080, 2009.



- 567 [115] Matthew Newville, Till Stensitzki, Daniel B Allen, Michal Rawlik, Antonino Ingargiola, and Andrew  
568 Nelson. Lmfit: non-linear least-square minimization and curve-fitting for Python. *Astrophysics Source*  
569 *Code Library*, 2016.
- 570 [116] Kenneth P. Burnham, David R. Anderson, and Kathryn P. Huyvaert. Aic model selection and multi-  
571 model inference in behavioral ecology: some background, observations, and comparisons. *Behavioral*  
572 *Ecology and Sociobiology*, 65(1):23–35, Jan 2011.
- 573 [117] Tim Sainburg. Code for "long-range sequential dependencies are phylogenetically pervasive in  
574 behavior and precede complex syntactic production in language". [https://github.com/timsainb/](https://github.com/timsainb/LongRangeSequentialOrgPaper)  
575 [LongRangeSequentialOrgPaper](https://github.com/timsainb/LongRangeSequentialOrgPaper), 2020.

576 **6 Supplementary Materials**

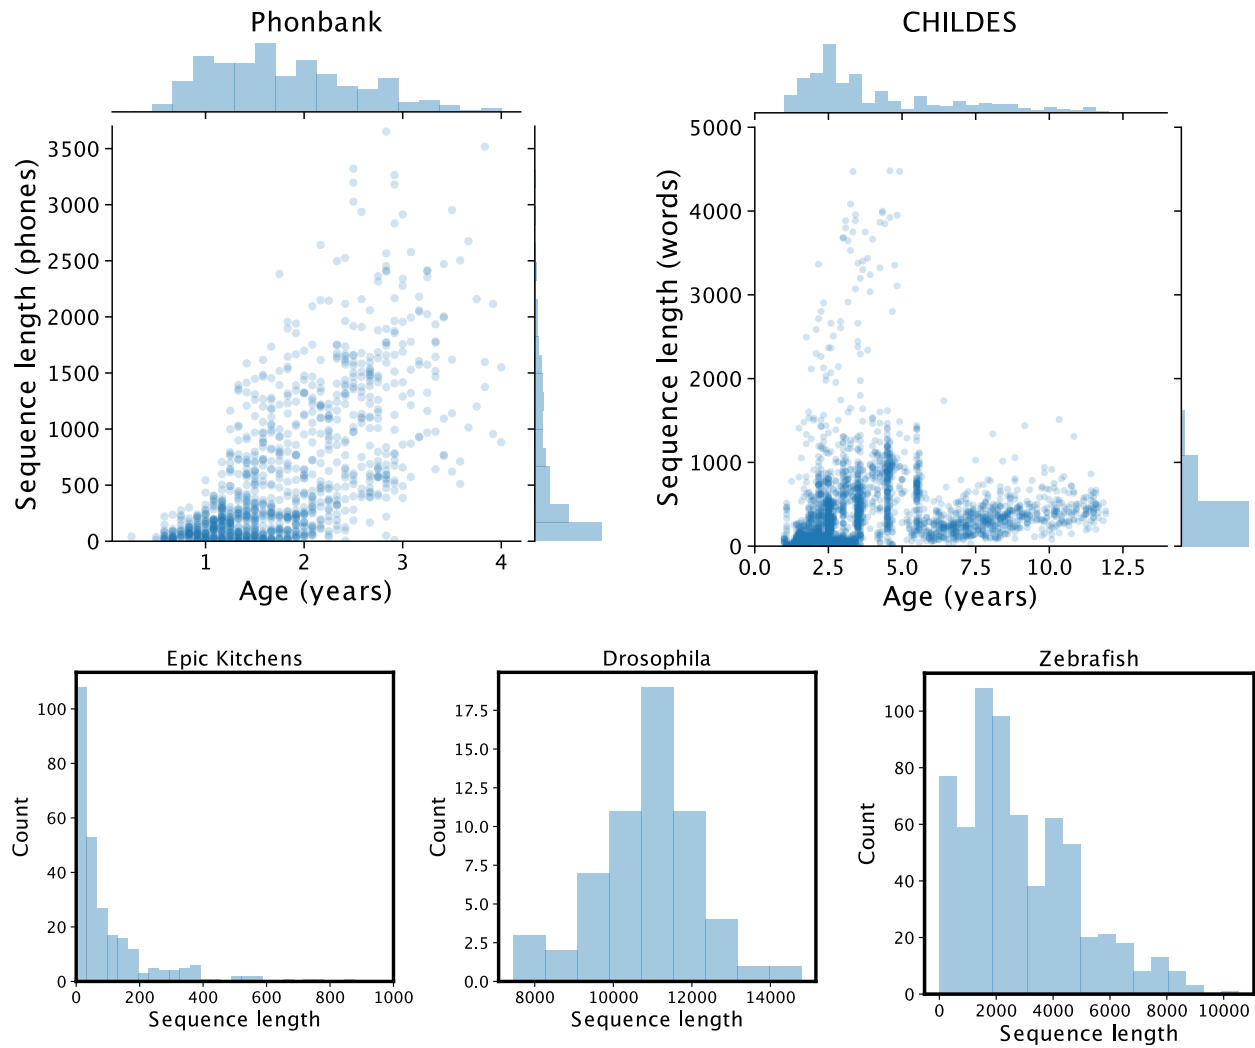

Figure S1: Distribution of sequence lengths for each dataset.

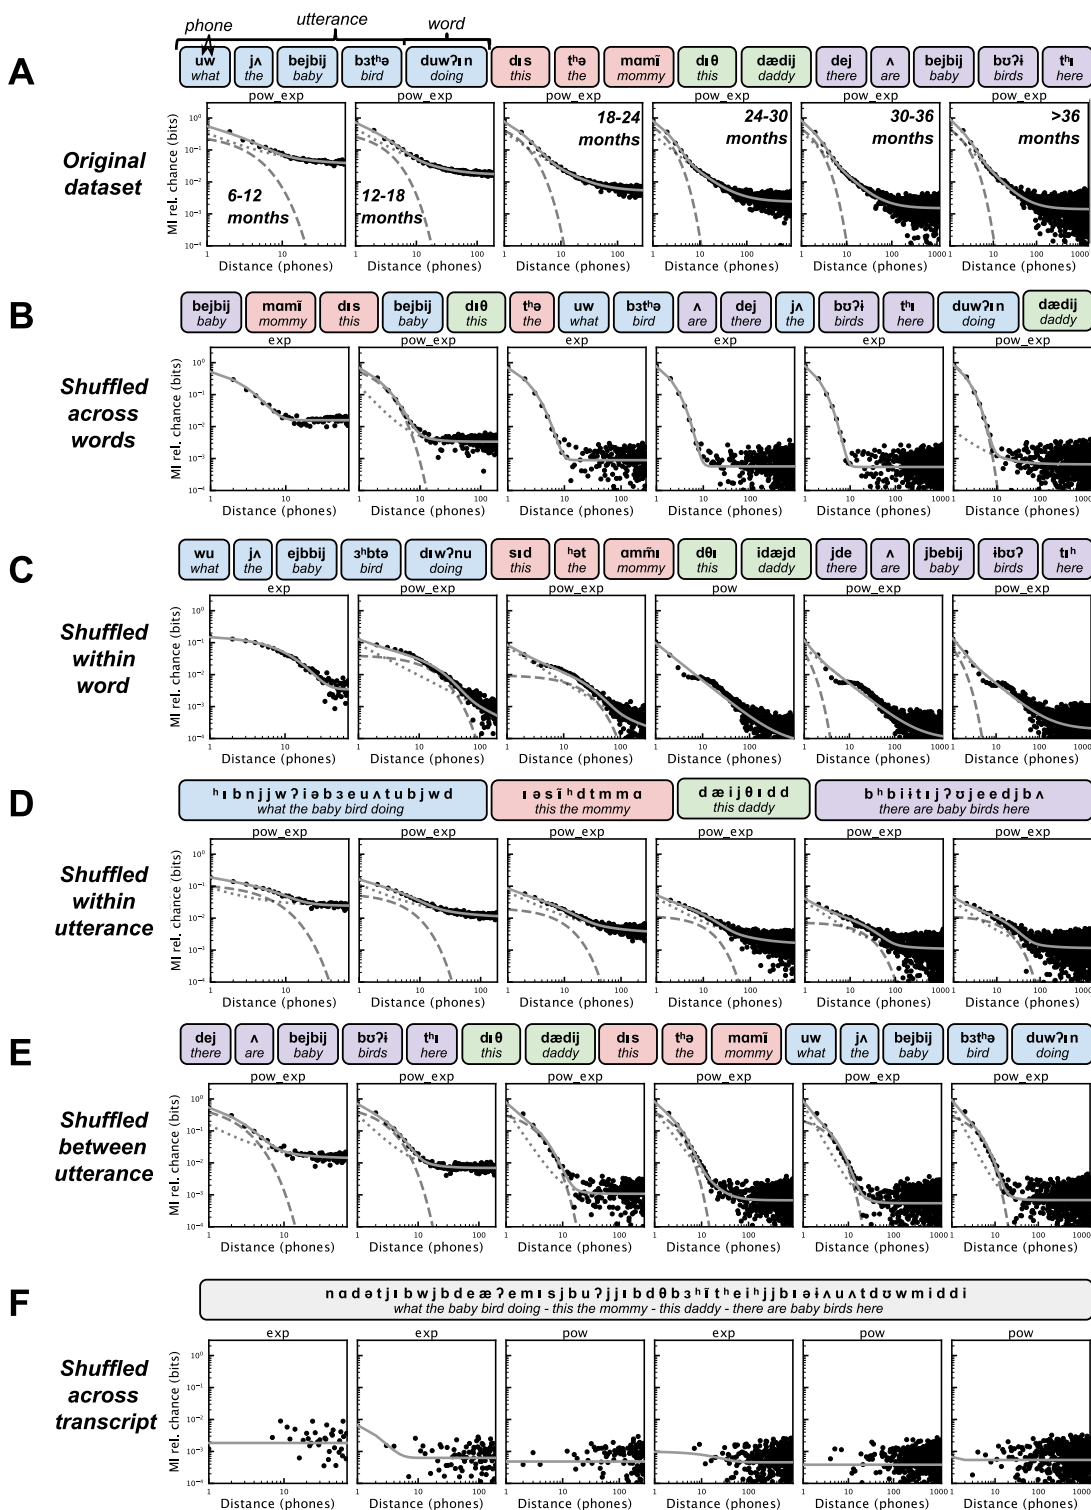

Figure S2: MI decay between phones under different shuffling conditions. (A) MI decay for each age group from the entire dataset, as in Fig. 2A. The sequence above the MI decay shows an example set of utterances of the corpus to illustrate the shuffling conditions. Utterances are grouped by color, words are grouped by rounded rectangles, and phones are displayed in bold above orthographic transcriptions. (B) Words are shuffled within each transcript. (C) Phones are shuffled within words. (D) Phones are shuffled within utterances. (E) Utterances are shuffled within each transcript. (F) Phones are shuffled within each transcript. The best fit model is printed above each plot, and is plotted as grey lines alongside the data and in Fig. 1.

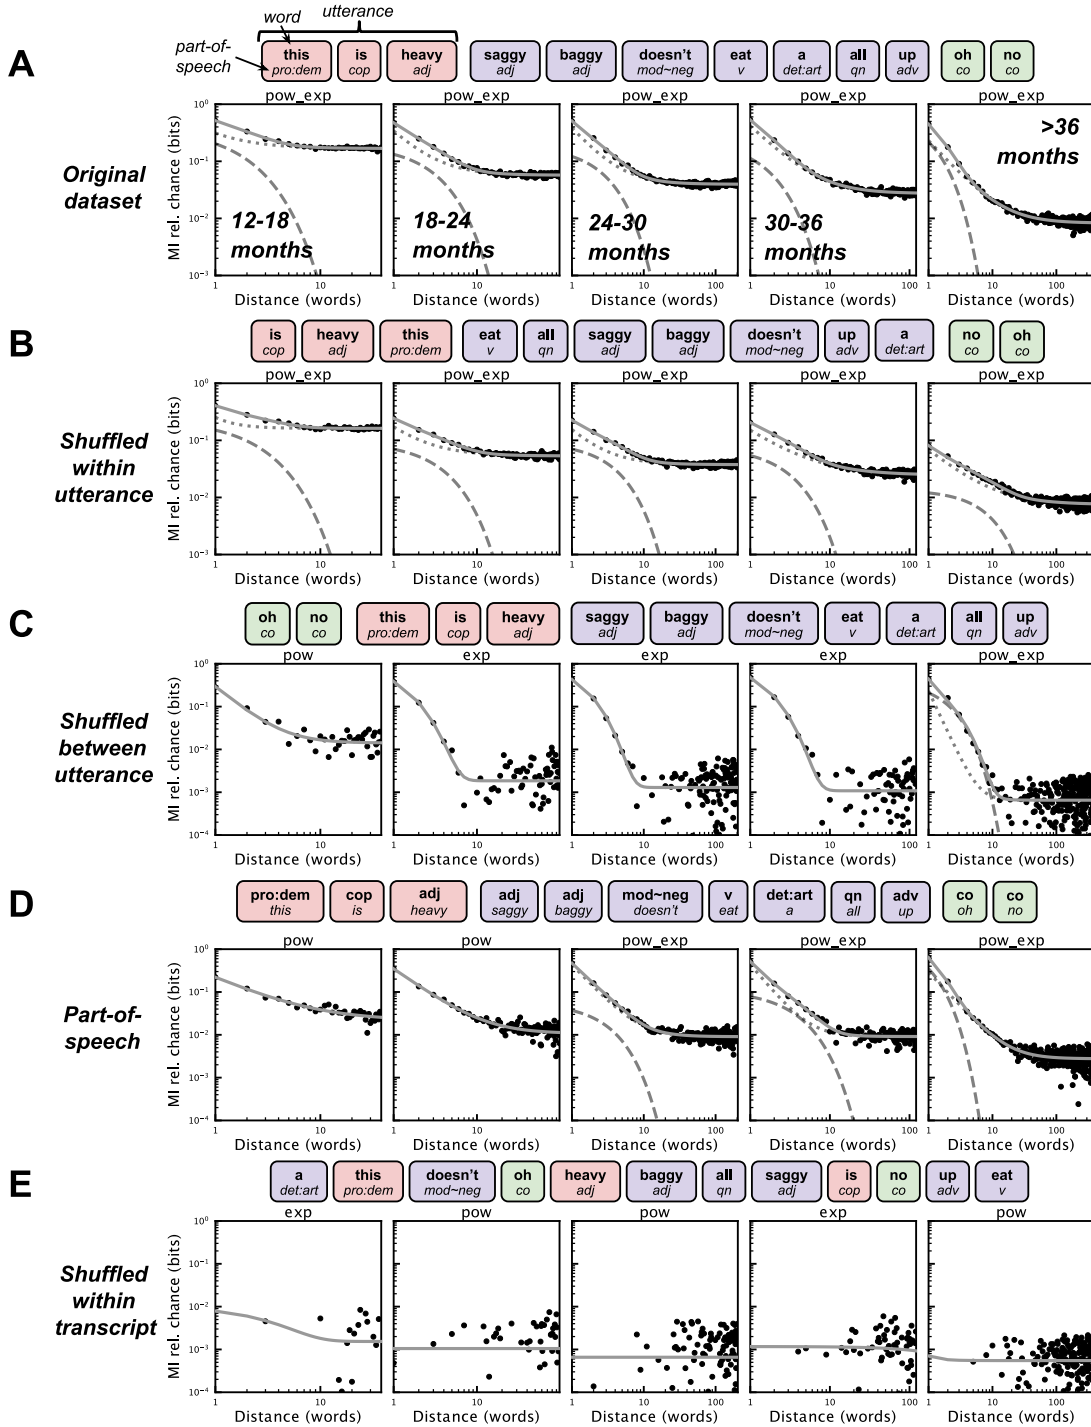

Figure S3: MI decay between words under different shuffling conditions. (A) MI decay for each age group from the entire dataset, as in Fig. 2D. (B) Words are shuffled within each utterance. (C) Utterances are shuffled within each transcript. (D) MI is calculated over part-of-speech transcriptions of words. (E) Words are shuffled within each transcript. (F) Words are shuffled within each transcript. The best fit model is printed above each plot, and is plotted as grey lines alongside the data and in Fig. 1.



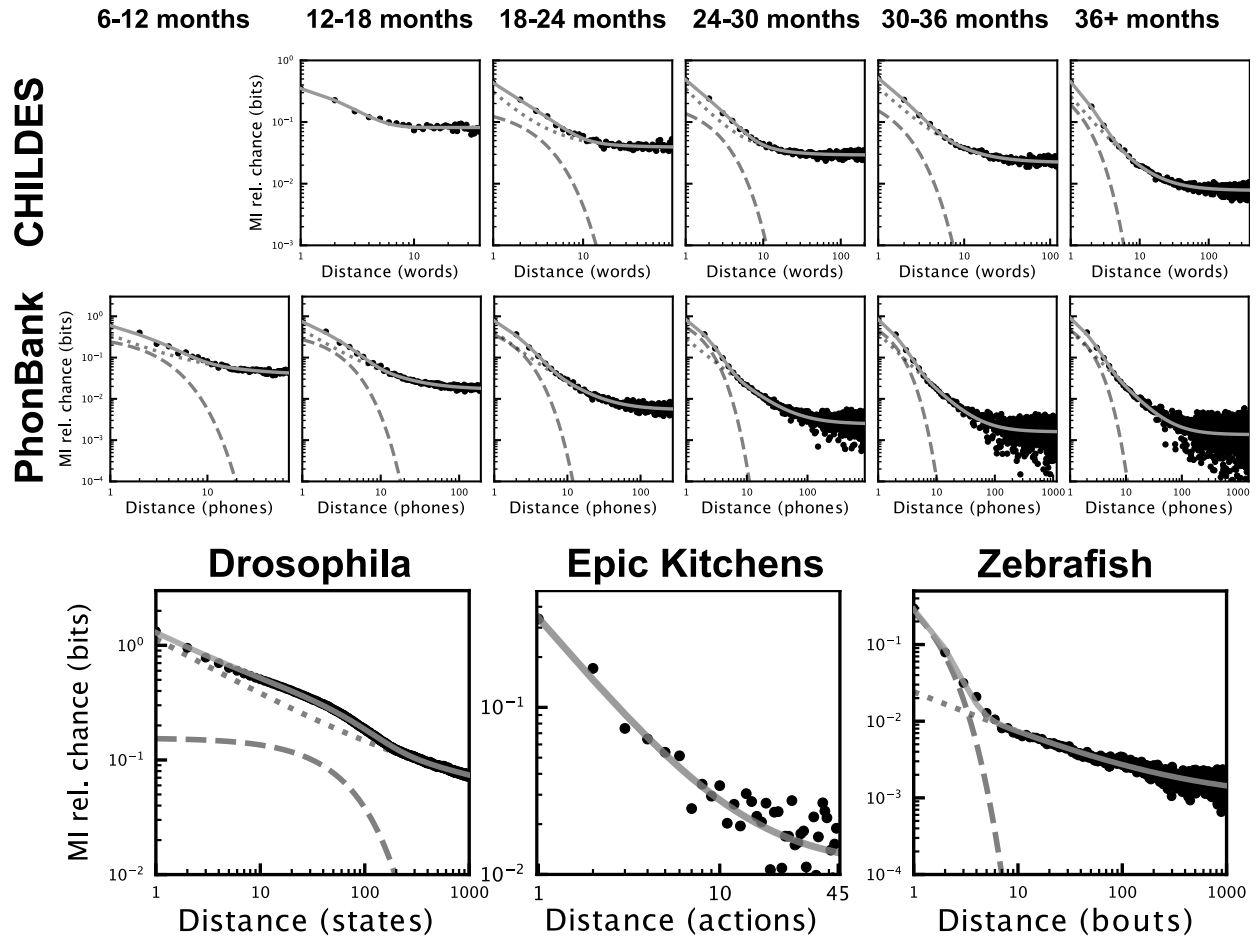

Figure S4: MI decay with repeated elements removed across each dataset.

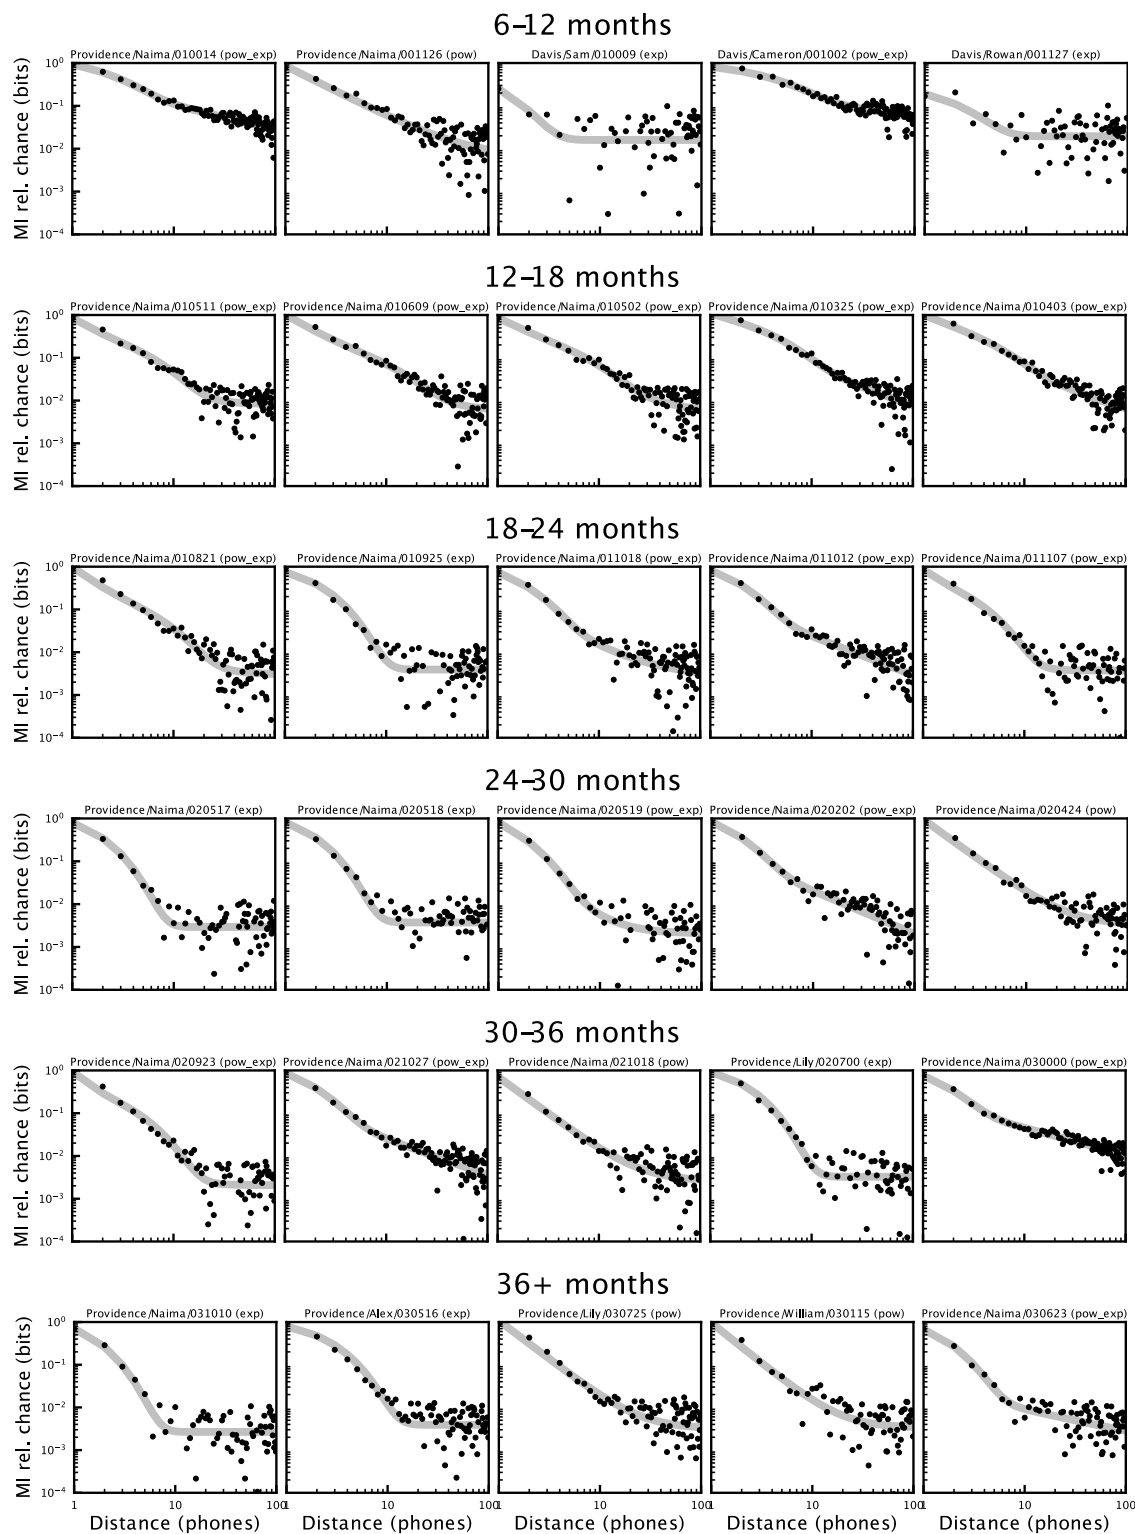

Figure S5: MI decay and best fit model of five largest transcripts for each age group across PhonBank. Transcript identity and best fit model are displayed above each plot.

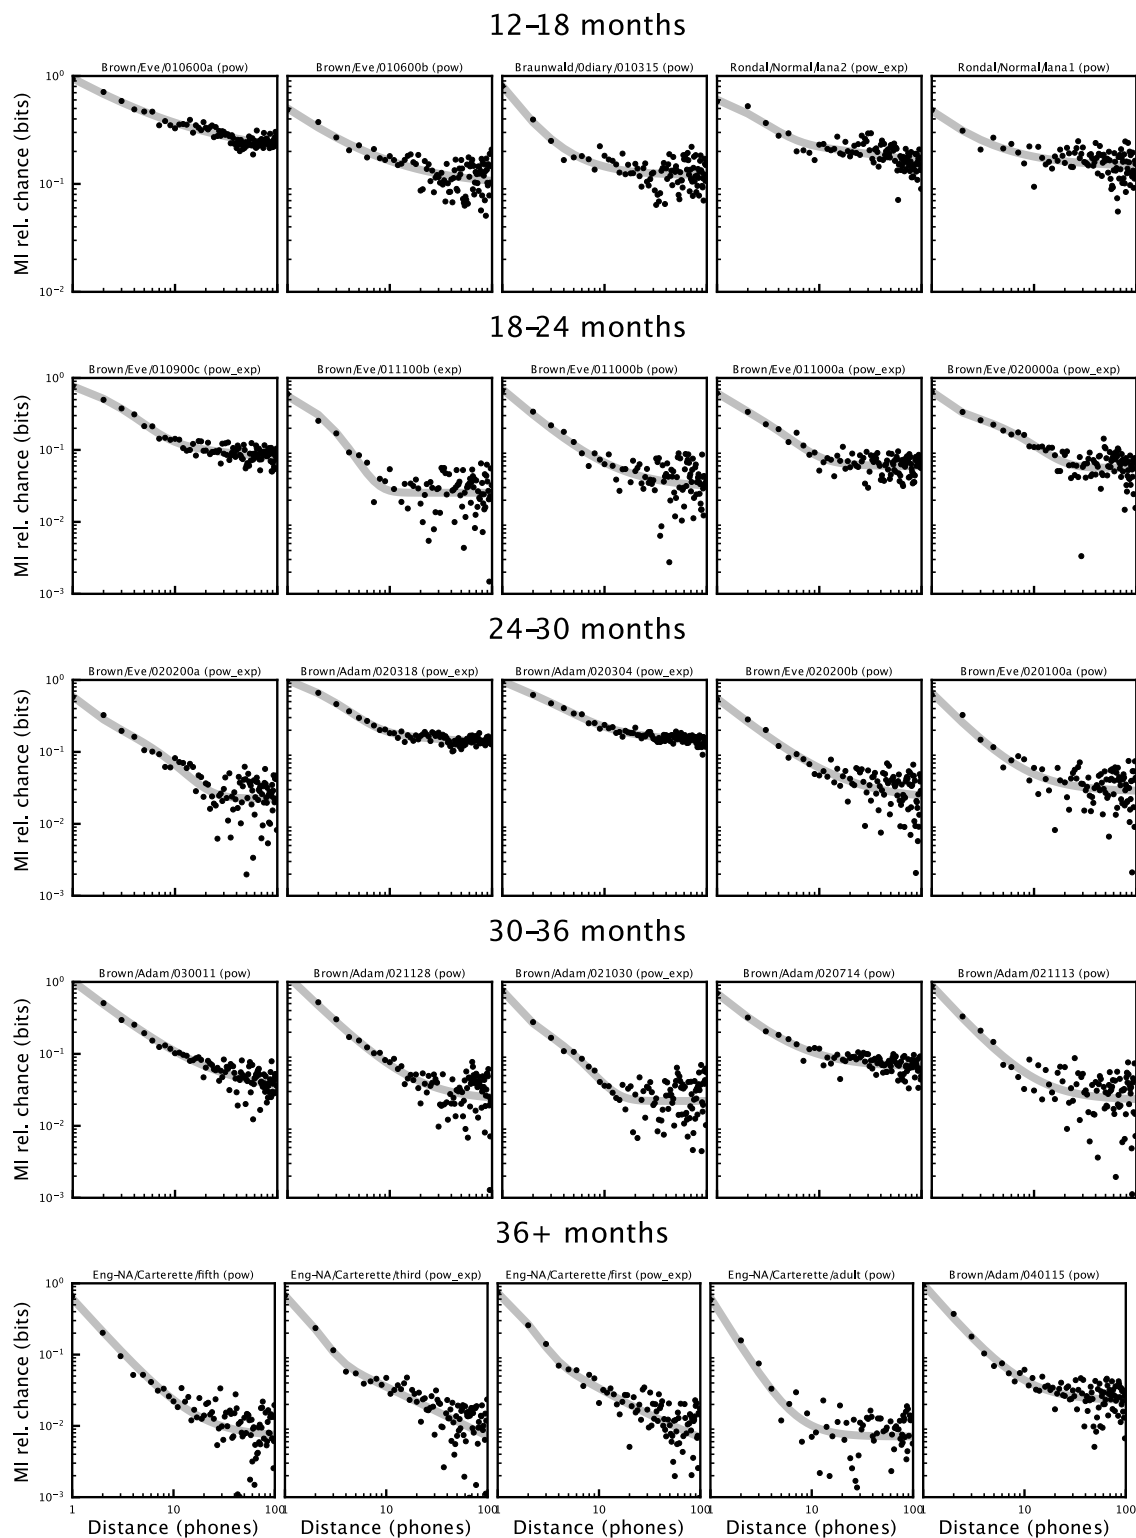

Figure S6: MI decay and best fit model of five largest transcripts for each age group across CHILDES. Transcript identity and best fit model are displayed above each plot.

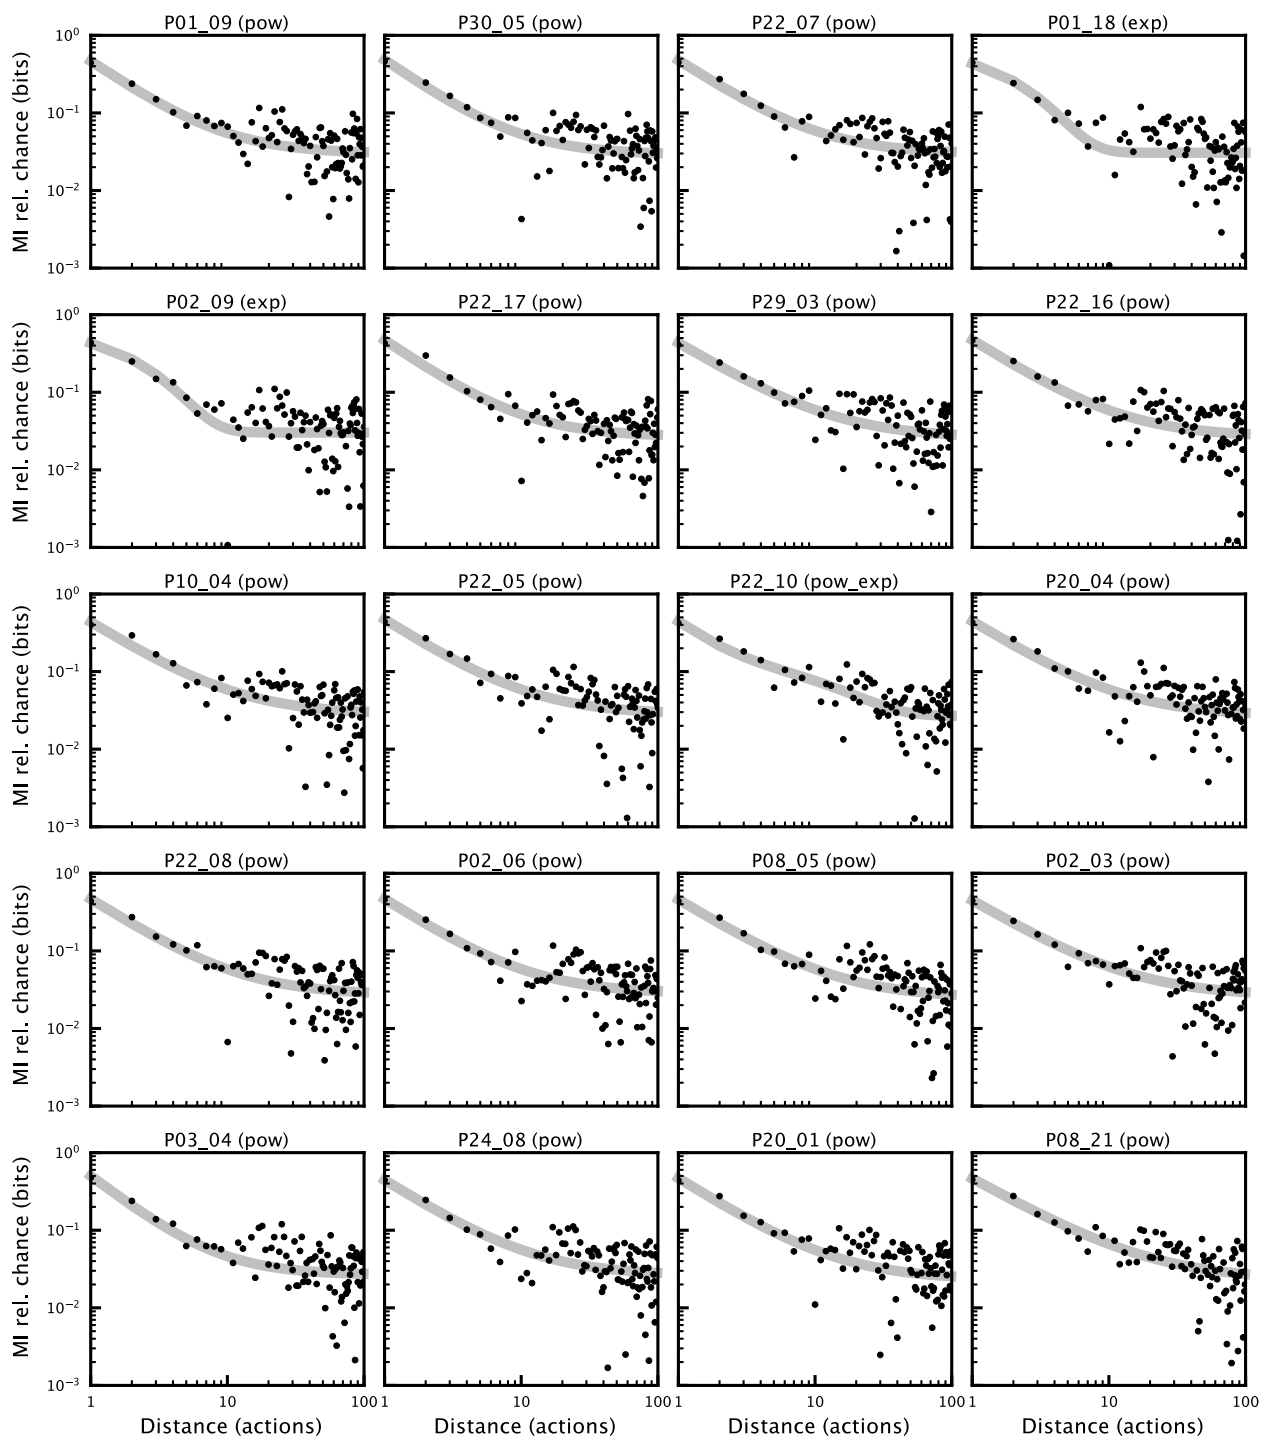

Figure S7: MI decay over the 20 longest Epic kitchens cooking sequences. Transcript identity and best fit model are displayed above each plot.

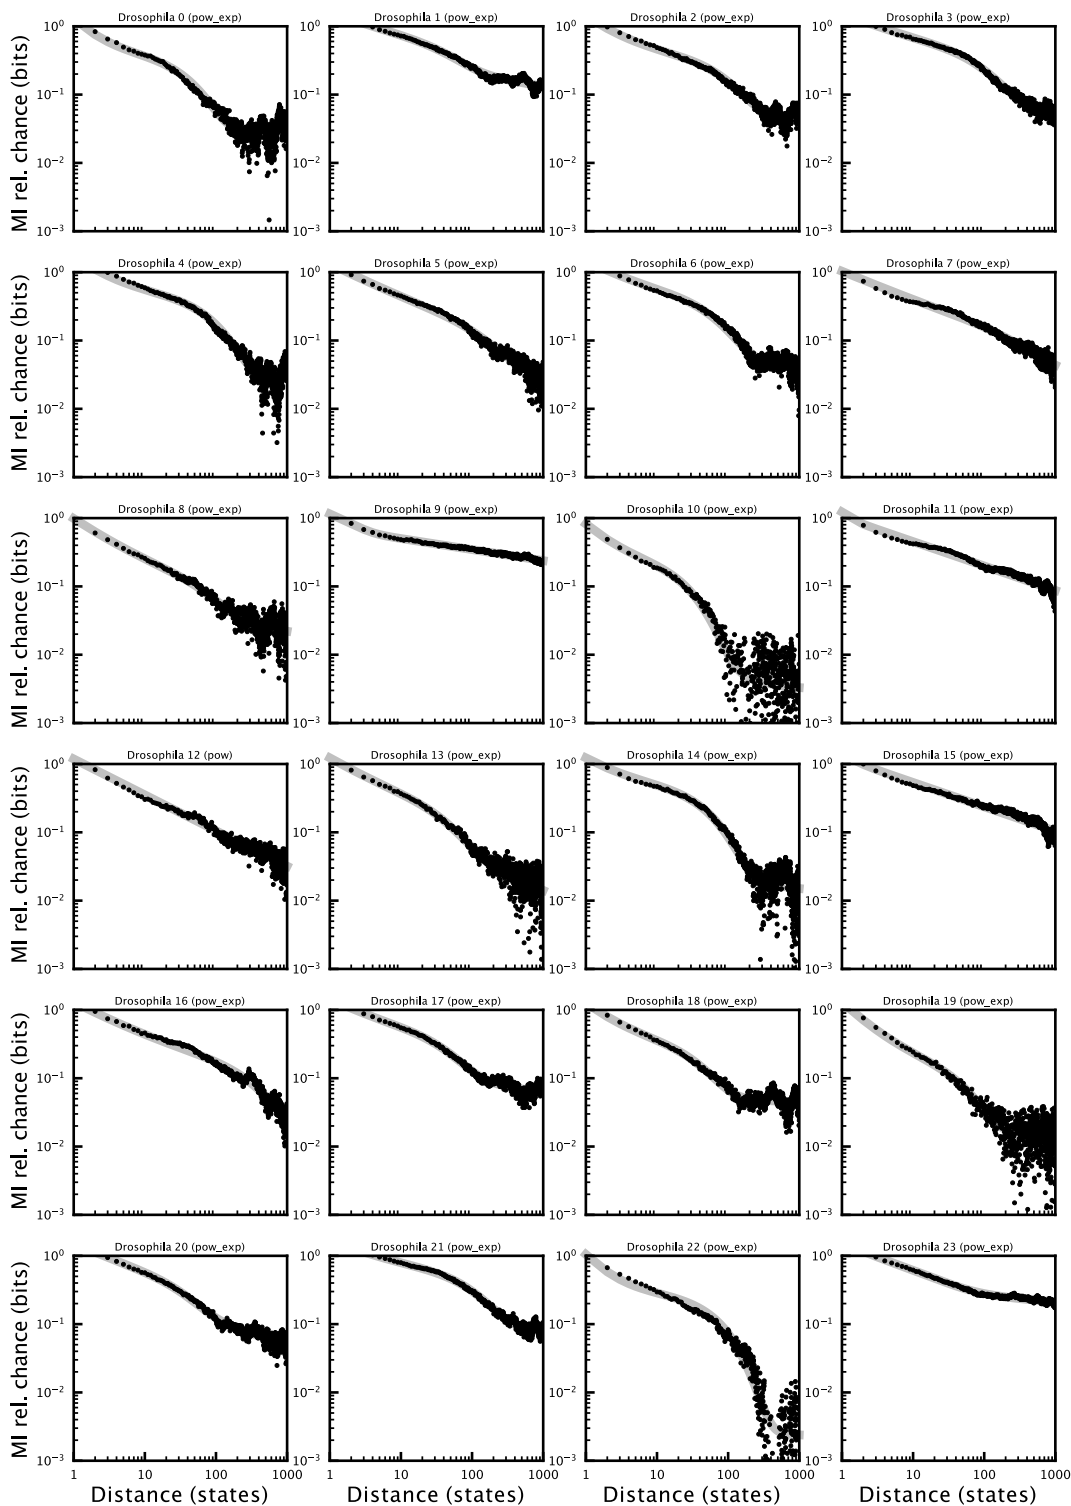

Figure S8: MI decay of example individual *Drosophila* behavioral sequences over one hour. Transcript identity and best fit model are displayed above each plot.



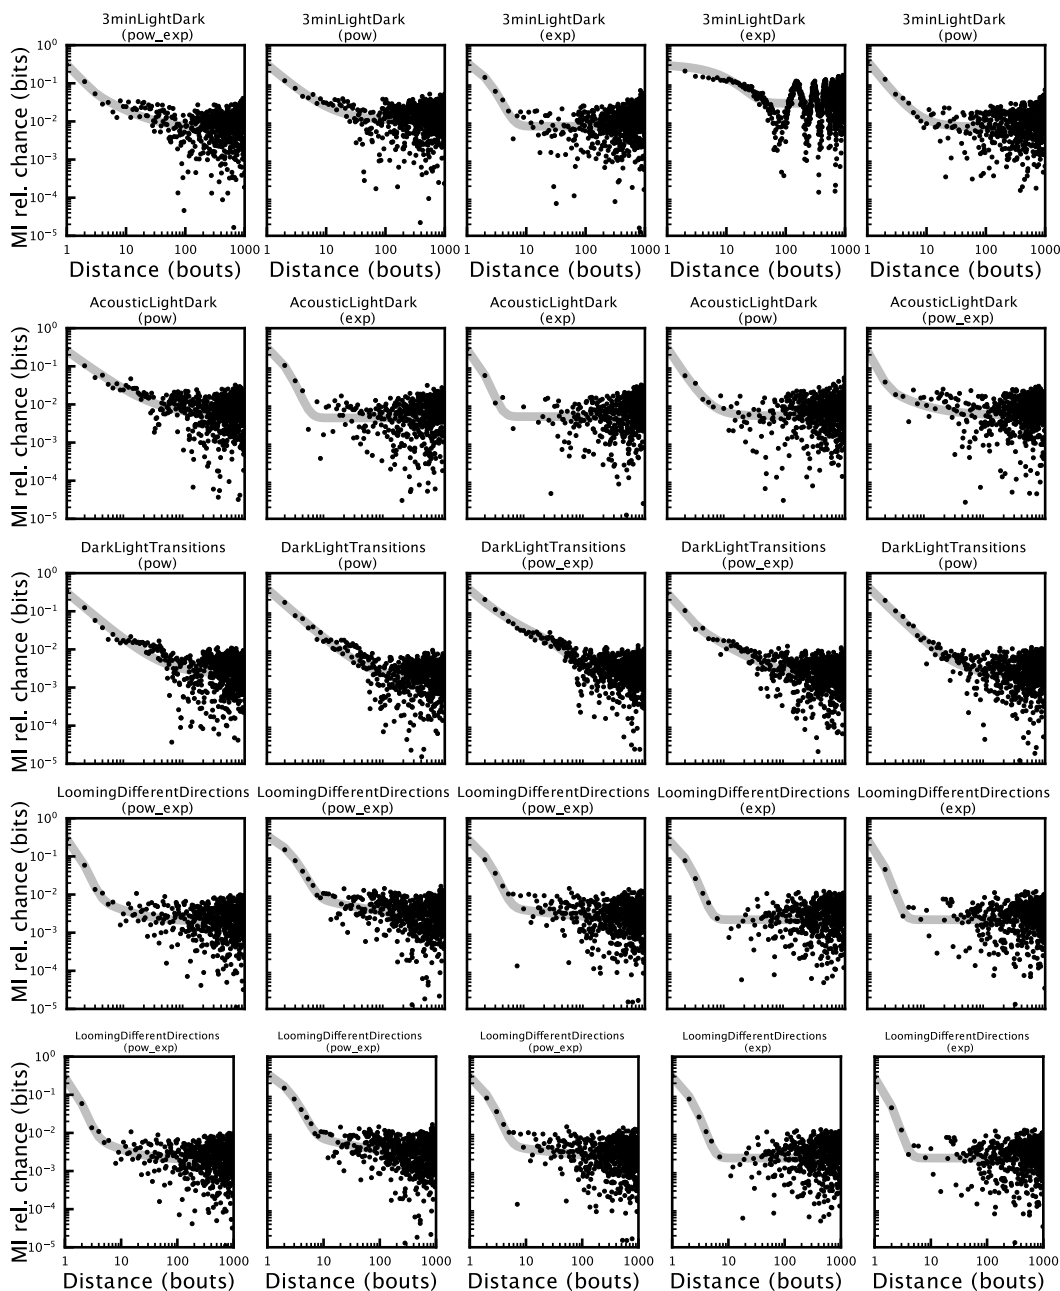

Figure S9: MI decay of several individual Zebrafish behavioral sequences. Each plot corresponds to the continuous behavior of a single Zebrafish. Each row corresponds to a different behavioral setting. The behavioral setting is written above the plot alongside the best fit model.

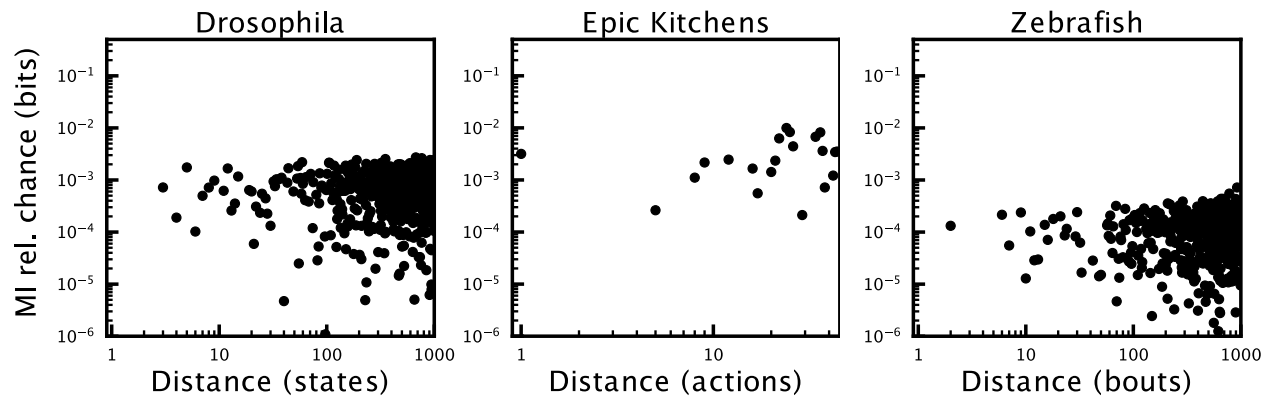

Figure S10: MI decay of shuffled sequences for Drosophila, Zebrafish, and Epic Kitchens datasets. No information decay is seen between elements of any sequence.

|                             | 12-18 months | 18-24 months | 24-30 months | 30-36 months | 3+ years |          |
|-----------------------------|--------------|--------------|--------------|--------------|----------|----------|
| <b>AICc</b>                 | exp.         | -313.876     | -696.201     | -1464.82     | -735.697 | -2314.6  |
|                             | combined     | -322.789     | -819.742     | -1737.37     | -951.049 | -2989.21 |
|                             | power-law    | -296.67      | -746.061     | -1623        | -933.579 | -2939.72 |
| $r^2$                       | exp.         | 0.997        | 0.992        | 0.991        | 0.986    | 0.973    |
|                             | combined     | 0.998        | 0.998        | 0.998        | 0.998    | 0.995    |
|                             | power-law    | 0.995        | 0.995        | 0.996        | 0.997    | 0.994    |
| <b>Relative likelihood</b>  | exp.         | 0.012        | <0.001       | <0.001       | <0.001   | <0.001   |
|                             | combined     | >0.999       | >0.999       | >0.999       | >0.999   | >0.999   |
|                             | power-law    | <0.001       | <0.001       | <0.001       | <0.001   | <0.001   |
| <b>Relative probability</b> | exp.         | 0.011        | <0.001       | <0.001       | <0.001   | <0.001   |
|                             | combined     | 0.989        | >0.999       | >0.999       | >0.999   | >0.999   |
|                             | power-law    | <0.001       | <0.001       | <0.001       | <0.001   | <0.001   |

Table 1: CHILDES dataset model fit results for each decay model as shown in Fig. 2.

|                             | 6-12 months | 12-18 months | 18-24 months | 24-30 months | 30-36 months | 3+ years |          |
|-----------------------------|-------------|--------------|--------------|--------------|--------------|----------|----------|
| <b>AICc</b>                 | exp.        | -5687.13     | -4842.29     | -4240.44     | -1371.61     | -1091.13 | -417.621 |
|                             | combined    | -5998.03     | -5302.25     | -5025.96     | -1903.5      | -1522.77 | -484.369 |
|                             | power-law   | -5993.7      | -5288.72     | -4971.83     | -1836.16     | -1369.5  | -437.315 |
| $r^2$                       | exp.        | 0.803        | 0.878        | 0.928        | 0.967        | 0.983    | 0.989    |
|                             | combined    | 0.841        | 0.919        | 0.971        | 0.995        | 0.998    | 0.996    |
|                             | power-law   | 0.841        | 0.918        | 0.969        | 0.994        | 0.996    | 0.992    |
| <b>Relative likelihood</b>  | exp.        | <0.001       | <0.001       | <0.001       | <0.001       | <0.001   | <0.001   |
|                             | combined    | >0.999       | >0.999       | >0.999       | >0.999       | >0.999   | >0.999   |
|                             | power-law   | 0.115        | 0.001        | <0.001       | <0.001       | <0.001   | <0.001   |
| <b>Relative probability</b> | exp.        | <0.001       | <0.001       | <0.001       | <0.001       | <0.001   | <0.001   |
|                             | combined    | 0.897        | 0.999        | >0.999       | >0.999       | >0.999   | >0.999   |
|                             | power-law   | 0.103        | 0.001        | <0.001       | <0.001       | <0.001   | <0.001   |

Table 2: PhonBank dataset model fit results for each decay model as shown in Fig. 2.

|                             |                  | Cooking  | Drosophila | Zebrafish |
|-----------------------------|------------------|----------|------------|-----------|
| <b>AICc</b>                 | <b>exp.</b>      | -236.312 | -6513.67   | -5125.71  |
|                             | <b>combined</b>  | -269.057 | -11115.3   | -7340.27  |
|                             | <b>power-law</b> | -269.846 | -8894.93   | -6066.59  |
| $r^2$                       | <b>exp</b>       | 0.98     | 0.952      | 0.918     |
|                             | <b>combined</b>  | 0.991    | 0.999      | 0.991     |
|                             | <b>power-law</b> | 0.991    | 0.996      | 0.968     |
| <b>Relative likelihood</b>  | <b>exp.</b>      | <0.001   | <0.001     | <0.001    |
|                             | <b>combined</b>  | 0.674    | >0.999     | >0.999    |
|                             | <b>power-law</b> | >0.999   | <0.001     | <0.001    |
| <b>Relative probability</b> | <b>exp.</b>      | <0.001   | <0.001     | <0.001    |
|                             | <b>combined</b>  | 0.403    | >0.999     | >0.999    |
|                             | <b>power-law</b> | 0.597    | <0.001     | <0.001    |

Table 3: Epic Kitchens, Drosophila, and Zebrafish model fit results at 45, 1000, and 1000 elements of distance respectively.

| Dataset           | Age (yrs)   | $a$         | $b$         | $c$          | $d$          | $f$         |
|-------------------|-------------|-------------|-------------|--------------|--------------|-------------|
| CHILDES           | 1-1.5       | 0.387±0.101 | 0.645±0.113 | 0.145±0.038  | -1.382±0.345 | 0.168±0.003 |
|                   | 1.5-2.0     | 0.194±0.022 | 0.382±0.034 | 0.283±0.016  | -1.461±0.083 | 0.057±0.001 |
|                   | 2-2.5       | 0.185±0.022 | 0.418±0.033 | 0.346±0.014  | -1.464±0.04  | 0.04±0.0    |
|                   | 2.5-3.0     | 0.239±0.099 | 0.753±0.105 | 0.391±0.039  | -1.367±0.053 | 0.027±0.0   |
|                   | >3          | 0.639±0.065 | 1.082±0.047 | 0.223±0.022  | -1.238±0.041 | 0.008±0.0   |
| PhonBank          | 0.5-1       | 0.326±0.065 | 0.391±0.045 | 0.301±0.041  | -1.013±0.087 | 0.035±0.002 |
|                   | 1-1.5       | 0.404±0.047 | 0.463±0.021 | 0.446±0.029  | -1.137±0.027 | 0.016±0.0   |
|                   | 1.5-2       | 0.891±0.098 | 0.794±0.032 | 0.358±0.042  | -1.234±0.044 | 0.005±0.0   |
|                   | 2-2.5       | 1.225±0.136 | 0.877±0.054 | 0.305±0.043  | -1.219±0.046 | 0.002±0.0   |
|                   | 2.5-3       | 1.112±0.255 | 0.908±0.1   | 0.38±0.082   | -1.381±0.07  | 0.001±0.0   |
| >3                | 1.019±0.371 | 0.857±0.137 | 0.476±0.132 | -1.433±0.087 | 0.001±0.0    |             |
| <i>Drosophila</i> | -           | 0.155±0.002 | 0.014±0.0   | 1.1±0.004    | -0.506±0.002 | 0.04±0.001  |
| Zebrafish         | -           | 0.943±0.054 | 1.33±0.051  | 0.06±0.005   | -0.661±0.052 | 0.0±0.001   |
| Cooking           | -           | -           | -           | 0.227±0.029  | -1.133±0.18  | 0.023±0.003 |

Table 4: MI decay parameters for Figs 2, 3, and 4. The parameters correspond to Equation 7 ( $a * e^{-x*b} + c * x^d + f$ ).  $a$  and  $b$  for the Cooking dataset are not shown because the best-fit model is the power-law model.



577 **7 Example sequences from datasets**

578 **7.1 PhonBank**

579 A random sample of the transcripts used in this manuscript at different ages. Each line corresponds to an  
 580 utterance and each utterance is followed by an orthographic representation in parentheses. ‘xxx’ in ortho-  
 581 graphic transcription refers to unintelligible speech and ‘yyy’ refers to phonological coding. The meanings of  
 582 other coding symbols such as ‘@’ and ‘&’ used in orthographic representations can be found in the TalkBank  
 583 manuals for PhonBank and CHILDES.

584 **7.1.1 Davis/Nate/001105.xml 11 months**

|                           |                        |                        |
|---------------------------|------------------------|------------------------|
| hɛ (xxx)                  | ʔɛ (xxx)               | ɛ (xxx)                |
| je (xxx)                  | hʌjʌlʌlʌlajæ (xxx)     | ʔɪ (xxx)               |
| gɪg (xxx)                 | bababa (xxx)           | ʔe: (xxx)              |
| ɛ (xxx)                   | ʔɛoʷ: (xxx)            | ʔɛ (xxx)               |
| ʔe (xxx)                  | bɪ: (xxx)              | hɛ (xxx)               |
| ʔɪʔe (xxx)                | jae (xxx)              | ɛ (xxx)                |
| hɔ (xxx)                  | æ (xxx)                | ʔɪ (xxx)               |
| jæhɛʔ (xxx)               | hɛ (xxx)               | ʔæʔ (xxx)              |
| ʔæ (xxx)                  | β: (xxx)               | ʔɛ (xxx)               |
| hɛʔ (xxx)                 | dejehe (xxx)           | ijɛ: (xxx)             |
| he (xxx)                  | eje:he (xxx)           | hæi (xxx)              |
| he (xxx)                  | æ (xxx)                | hɛd <sup>h</sup> (xxx) |
| ʔɪ (xxx)                  | d <sup>w</sup> æ (xxx) | hɪ (xxx)               |
| hɪ (xxx)                  | ʔʌ:oʷ (xxx)            | læ (xxx)               |
| hæ (xxx)                  | ɱ (xxx)                | ʔʌ (xxx)               |
| hɛ (xxx)                  | hæ (xxx)               | tɪtɪ:de (xxx)          |
| ʔɛ (xxx)                  | ʔæʔʌʔdɪ (xxx)          | sædɪ (xxx)             |
| ʔɛ:æ (xxx)                | p <sup>h</sup> (xxx)   | ʔʌ:æo (xxx)            |
| ɛæ: (xxx)                 | ɱbuʔ (xxx)             | ʔæ (xxx)               |
| ɛ (xxx)                   | bubwɪ (xxx)            | ʔɛ: (xxx)              |
| æa (xxx)                  | ʔɛ: (xxx)              | ʔuʃ (xxx)              |
| ʔɛʔʔɪʔ (xxx)              | ɛjæ̃ (xxx)             | wɪ (xxx)               |
| ʔɛ (xxx)                  | hʌ: (xxx)              | hɛ: (xxx)              |
| ʔɛ (xxx)                  | mʌ (xxx)               | hɛ (xxx)               |
| dɪ (xxx)                  | ɛ (xxx)                | ʔæɪje: (xxx)           |
| ɛʔɛ:æ: (xxx)              | hejæ (xxx)             | ʔʌuʔoʔ (xxx)           |
| jejɪ (j@l)                | dæwu (xxx)             | ʔɪʔ (xxx)              |
| jæjɛ̃ (xxx)               | wɛ (xxx)               | ʔɪʔɛ: (xxx)            |
| hæ (xxx)                  | hɪ (xxx)               | ʔɛ:æɛ (xxx)            |
| hɛ (xxx)                  | ʔɪʔɪhɛɛ:ʔɛʔɛ̃ (xxx)    | æ (xxx)                |
| hæh (xxx)                 | he:jæɛ (xxx)           | ɛ (xxx)                |
| hɛ (xxx)                  | ʔeʔ (xxx)              | ʔɛ (xxx)               |
| ʔɛ (xxx)                  | ɛæ:e (xxx)             | ʔɛ (xxx)               |
| hæ (xxx)                  | ʔɪʔɛ (xxx)             | gʊʃ (xxx)              |
| b <sup>w</sup> ʌʔβ: (xxx) | jæwɛ (xxx)             |                        |

585 **7.1.2 Providence/William/011115.xml 23 months**

|                            |                                 |                         |
|----------------------------|---------------------------------|-------------------------|
| wəʃ 'di (what's this)      | 'jʌmi: (yummy)                  | 'no 'bʌg'ɛt (no pocket) |
| 'ni (yyy)                  | 'gʊ 'dʒʊs (good juice)          | 'no 'bʌkɛt (no pocket)  |
| 'ʌ di 'kwomə (are yyy yyy) | 'ja (yah)                       | 'nu (no)                |
| u'kwo 'wa: (yyy yyy)       | 'aʊ mə 'tɑ'meɪ (I wanna Thomas) | 'okeɪ (okay)            |
| ə'kwo 'wa (yyy yyy)        | 'ʌwə 'tɑmʊt (yyy Thomas)        | 'ɔ (yyy)                |
| 'mɑ'mi (mommy)             | 'tɑm rɪ'fɪʔ (Thomas yyy)        | 'okeɪ (okay)            |
| 'jami (yummy)              | 'bʌ'keɪ (pocket)                | 'okeɪ (okay)            |
| 'ðʊs (juice)               | 'noʔ 'no 'bɑgɪt (yyy no pocket) | 'je (yeah)              |

|                                                     |                                                   |                                                   |
|-----------------------------------------------------|---------------------------------------------------|---------------------------------------------------|
| 'ogε (okay)                                         | 'wʌn 'dæd 'ɑmɑ (wan dad yyy)                      | * 'tʃʌk (xxx truck)                               |
| 'ei (yyy)                                           | 'no (no)                                          | * 'trʌk (xxx truck)                               |
| 'wai (why)                                          | 'no 'ɑ 'wɑ (no ice pop)                           | * (xxx)                                           |
| wə 'tɔw ɪz ɪt (what time is it)                     | 'no (no)                                          | 'di jə 'si: (do you see)                          |
| 'wai 'wai (why why)                                 | 'ε 'no (yyy no)                                   | 'nmi 'di:ʃi 'tʃrʌk (yyy yyy truck)                |
| 'no (no)                                            | 'æbəlæs (ambulance)                               | 'mɪbɛbit * (yyy xxx)                              |
| 'okɛɪ (okay)                                        | 'hæmbəlɪnt (hi ambulance)                         | 'tʃrʌk (truck)                                    |
| 'jɛ (yeah)                                          | 'æbəlæns (ambulance)                              | 'ni 'nɪnəðəðə 'trʌk (yyy yyy truck)               |
| 'n:ɔ: (no:)                                         | ə'wæ'wiw (yyy)                                    | * 'tʃrʌk (xxx truck)                              |
| 'ɔpən (open)                                        | 'faɪjə'ɛ'dʒɪnt (fire + engine)                    | * 'trʌk (xxx truck)                               |
| 'o (no)                                             | 'no (no)                                          | * 'tʃrʌk (xxx truck)                              |
| o'bɛn (open)                                        | 'no 'tʃrʌk (no truck)                             | 'dʌ'tʃrʌk (dump + truck)                          |
| 'dæ'ri (daddy)                                      | 'wɑ də 'tɪvi (watch the tv)                       | ɪz 'dæ ə 'tʃrʌk (is that a truck)                 |
| 'dæ'ri (daddy)                                      | 'bɔni (Barney)                                    | 'hɪz 'trʌk (a truck)                              |
| 'dæ'ri (daddy)                                      | 'bɔni (Barney)                                    | 'trʌk 'dæt 'tʃrʌk (truck that truck)              |
| 'dæ'ri (daddy)                                      | 'nʌ?'o (no)                                       | 'tʃʌ * (truck xxx)                                |
| 'dæri (daddy)                                       | 'mʊ? (yyy)                                        | 'o'heɪ (okay)                                     |
| 'dæ'ri (daddy)                                      | 'wʌ 'hɪ'jʌ (right here)                           | 'ʌ? 'ʌ 'ɪzə * 'pʌzə (yyy yyy yyy<br>→ xxx puzzle) |
| ə'dæri (daddy)                                      | 'ʌ 'wʌr 'ɪ? (yyy what it)                         | * (xxx)                                           |
| 'dæ: (daddy)                                        | 'mʌ wʌr 'ɪz 'ɪt 'twʌk (yyy what is<br>→ it truck) | * (xxx)                                           |
| 'no (no)                                            | 'u: 'u (ooh ooh)                                  | 'dɑ (yeah)                                        |
| 'no (no)                                            | 'no: (no)                                         | 'no: 'no 'no 'nop (no: no no no)                  |
| 'bɑ'bʌs (yyy)                                       | 'ʌ? 'o (uhoh)                                     | 'ei 'bi 'sɪz (abcs)                               |
| 'no (no)                                            | ðə 'dʌm'trʌk (the dump + truck)                   |                                                   |
| 'no 'dʒɪkə 'bu bʌm (no<br>→ chicka_boom_boom@si)    | tʃ^'ʌk (truck)                                    |                                                   |
| 'ʌ 'no ɔ 'dʌn (yyy no all done)                     | 'i'nʌt (night + night)                            |                                                   |
| 'aɪjə 'nʌ? 'ʌ? 'nu 'gʌmə (yyy yyy<br>→ yyy yyy yyy) | * 'tʃrʌk (xxx truck)                              |                                                   |

586

— (continued) —

587 7.1.3 Goad/Julia/20510.xml 29 months

|                                                    |                                                              |                                                              |
|----------------------------------------------------|--------------------------------------------------------------|--------------------------------------------------------------|
| tʰɔʃ pʰɑpʰ (toast pop)                             | wɪ rʌ beɪbɪj tʰɑwkʰɪ bawtʰ (what<br>→ the baby talkin about) | je mij tʰuw aj dow dæ? tʰuw<br>→ (yeah me too I do that too) |
| ?ʌ bɪlʊ:w (a balloon)                              | jɪs maj dæ? ʃɪftʰ ?ɪs (yes my dad<br>→ shaved his)           | ?ɑ duw dæ? tʰow (I do that too)                              |
| bɪŋkʰ bɑbɔ (big bubble)                            | m ə bɔks (in a books)                                        | ?æn nɪçlɪs tʰʌ (and Nicolas too)                             |
| ə nɑjɪn (a lion)                                   | wʌs kʰæmʌ dʌ?ɪn (what's camel<br>→ doing)                    | ?aj ɔwpʰɛj maj dʌf (I open my<br>→ mouth)                    |
| wʊhəs dɑt kʰɪjə duwɪn (what's<br>→ that kid doing) | jes aj dʌuw (yes I do)                                       | wʌ jʌ pʰɛjn?ɪfɪs duwəjɪ (what the<br>→ peoples doing)        |
| dʌn pʰɛŋkʰ (can 0of paint)                         | wʌ tʰæmʌ dʌəɪ (what camel<br>→ doing)                        | we ja pʰɜsɪ (what the person)                                |
| wʌs də mæn dowɛ (what's the<br>→ man doing)        | pʰɪw mɑmɪ seɪ (what mommy<br>→ say)                          | lɪtʰə pʰɛpʰɪʃ dɔjɪn (little peoples<br>→ doing)              |
| kʰʌpfajə (campfire)                                | wə ðə mɑmɪj seɪŋ (what the<br>→ mommy saying)                | pʰɛtʰ ?awʊ (pet owl)                                         |
| əkʰɛpfaj tʰɛw maj mɑm (campfire<br>→ tell my mom)  | wʊ dædɪj duwɪŋ (what daddy<br>→ doing)                       | ?ɑ duw dæt tʰuw awʊ (I do that<br>→ too Owl)                 |
| mej kʰæpfajʌ (make campfire)                       | ?ɑ dʊ dæ tʰuw (I do that too)                                | nʌ fɪn (no thanks)                                           |
| tʰʌmuw tʰʌmɪn (camel coming)                       | æn mij tʰʌ (and me too)                                      | hʌ? hɪm duwəjɪn (what him<br>→ doing)                        |
| dɪ hə bəlow (this is blue)                         | wʌ hɪm duwəɪn (what him doing)                               | maj mɑm ʃow mij (my mom<br>→ show me)                        |
| ?awfɪtʰ (elephant)                                 | hʌ beɪbɪj tʰɑjɪŋ (the baby crying)                           | ?ɛn kʰe: tʰuw (and Kate too)                                 |
| ?ʌ beɪbɪj əfɪtʰ (a baby elephant)                  | wʌ ðə mæn duwəjɪn (what the<br>→ man doing)                  | kʰɛt tʰowm (Kate too)                                        |
| wʌs ə neɪ duwɪŋ (what's the lady<br>→ doing)       | ?ɑ dʊ dætʰ (I do that)                                       | ?esajkʰ (outside)                                            |
| wɪjθ dow rʌf (wings fell off)                      | kʰɛcɪj (sixteen)                                             | maj dæ duw dætʰ (my dad do<br>→ that)                        |
| wəhe ə fɑx duwɛn (what are frogs<br>→ doing)       | ?owh je mʌkʰɪn dowɪ (what the<br>→ monkey doing)             | ?ɛn maj mɑm duw dɛ? (and my<br>→ mom do that)                |

bejbij t<sup>h</sup>ajɛ: (baby tired)      dowɨj tʃɿɿ (drying himself)  
 də bejbɪθ t<sup>h</sup>ajə (the baby's tired)      hap<sup>h</sup>ij t<sup>h</sup>ə jɿ: (happy to you)

588

— (continued) —

589 7.1.4 Providence/Alex/021122.xml 36 months

|                                                                 |                                                              |                      |
|-----------------------------------------------------------------|--------------------------------------------------------------|----------------------|
| 'wo 'wɿts ɪs 'ɛ: (yyy what's this<br>→ yyy)                     | 'tʃɿklɪt 'dɿŋk (chocolate yyy)                               | 'pɪz (peas)          |
| 'ɪs 'pɿwɪs 'hɛt (yyy yyy yyy)                                   | 'u: 'wɿts ɪs (ooh what's this)                               | 'u: (school)         |
| 'u: (yyy)                                                       | 'wɿts 'ðɪs (what's this)                                     | 'sku: (school)       |
| * 'pɿrɪ:ri (xxx pretty)                                         | 'u: ə 'bɪg 'keɪk (ooh a big cake)                            | ə'weɪŋ (swing)       |
| 'pɿrɪ (yyy)                                                     | 'wɿts 'ɪs (what's this)                                      | 'stɑ: (star)         |
| 'wo 'aɪ 'laɪk 'ðæt (whoa I like<br>→ that)                      | 'ɿb 'wɿts 'ɪs (yyy what's this)                              | 'flæg (flag)         |
| ə 'pɿsələ 'kʊki 'tʃweɪ 'pɿ (yyy yyy<br>→ yyy yyy yyy)           | 'dʒɔðəts (yyy)                                               | 'stɛz (stairs)       |
| ə 'pɿkɪn (a pumpkin)                                            | 'wɿz 'ɪz 'ðɪs (what is this)                                 | 'ɿvɪn (oven)         |
| 'bu: (yyy)                                                      | 'wɿts 'ðɪs (what's this)                                     | 'bɛntʃ (bench)       |
| 'wu (yyy)                                                       | 'ɿju 'ɪr ɪt (yyy eat it)                                     | 'berəm (bedroom)     |
| 'wɿts 'ɪs (what's this)                                         | 'spweɪkɔs (sprinkles)                                        | 'bed (bed)           |
| 'wɿts 'ɪs (what's this)                                         | 'no ðə 'steɪzəs (no yyy yyy)                                 | 'tau: (towel)        |
| 'wɿts zɪs (what's this)                                         | 'dʒɪ'dʒɪ (Gigi)                                              | 'tweɪ (tray)         |
| 'wɿts ɪs (what's this)                                          | 'aɪ: kə 'du ə 'ðɪ (I can do yyy it)                          | 'tæʃ (trash)         |
| 'ɿ (yyy)                                                        | o'keɪ (okay)                                                 | 'plɛt (plate)        |
| 'u: (ooh)                                                       | 'o (oh)                                                      | 'plɛt (plate)        |
| ə 'tʃwɔlə (a yyy)                                               | * 'mɿm (xxx Mom)                                             | 'mɒp (mop)           |
| 'wɔz ɹ də 'wɿ (those are the yyy)                               | 'je (yeah)                                                   | 'kɔm (comb)          |
| 'ðɔz ə ðə 'wɿrə (those are the<br>→ water)                      | 'dʒɪ'dʒɪ * (Gigi xxx)                                        | 'bwʊm (broom)        |
| ðə 'wɿrə 'sli (the water yyy)                                   | 'dʒwɿ:ʒɪ (yyy)                                               | 'lɛg (leg)           |
| ə'tɪho * (yyy xxx)                                              | * 'dʒɪ'dʒɪ (xxx Gigi)                                        | 'hænd (hand)         |
| 'ɿm 'wɿts ɪs (&-um what's this)                                 | 'no 'mɿmi (no Mommy)                                         | 'ɪ: (ear)            |
| 'gɔst 'kʊkɪs 'wɿts 'ɪs (ghost<br>→ cookies what's this)         | 'wɿz 'dɑ:ri (where's Daddy)                                  | 'tʃɪn (chin)         |
| ə 'kʊkɪs (a cookies)                                            | ə 'spwɪkəl 'donət (a sprinkle<br>→ donut)                    | 'sɒk (sock)          |
| 'ɿb (yyy)                                                       | 'aɪ 'laɪk ə 'spwɪŋkəl 'donət (I like<br>→ a sprinkle donut)  | 'ʃu (shoe)           |
| ə 'bʌg (a bug)                                                  | 'mɿmi (Mommy)                                                | 'nekləs (necklace)   |
| 'wɔɑ: 'ɿzə 'tʃɪkɪn (yyy yyy<br>→ chicken)                       | 'aɪ 'laɪk ə 'spweɪŋkəl 'donət (I like<br>→ a sprinkle donut) | 'hæt (hat)           |
| 'ʃɪki 'aɪ 'laɪk 'dæt 'tʃɪkɪn (chicken I<br>→ like that chicken) | 'jæ (yeah)                                                   | 'kaɪ: (sky)          |
| 'u (ooh)                                                        | ə 'dɿn 'pleɪɪŋ (are Owe done<br>→ playing)                   | 'pɑ:ri (party)       |
| 'u: (ooh)                                                       | əɪ 'dɿn 'pleɪɪŋ (are we done<br>→ playing)                   | 'no (no)             |
| 'u: (ooh)                                                       | 'mɿmi (Mommy)                                                | 'fwɛnd (friend)      |
| 'ɿm (&-um)                                                      | ə'lɒkətʃɿ * (yyy xxx)                                        | 'pɜ:sən (person)     |
| 'fwʊt (fruit)                                                   | 'ɿl 'teɪk ju * (I'll take you xxx)                           | 'baɪ (bye)           |
| 'ɿlɪvz (olives)                                                 | * 'teɪk * (xxx take xxx)                                     | 'haɪ (hi)            |
| 'weɪps (grapes)                                                 | * 'teɪk ju (xxx take you)                                    | 'no (no)             |
| 'blu'beɪvɪ (blueberry)                                          | 'aɪ 'laɪk ə 'teɪk ju 'mɿm (I like yyy<br>→ take you Mom)     | 'ʃɒpɪ (shopping)     |
| 'wɿts 'ɪs (what's this)                                         | 'aɪ 'teɪk ju (I take you)                                    | 'θeɪg ju (thank you) |
| 'pɜ:pə 'gweɪps (purple grapes)                                  | 'ɿ wɪ 'ɿl 'dɿn (are we all done)                             | 'kæwɪ (carry)        |
| 'wɑ: 'pweɪs'dɿ (yyy pretzels)                                   | 'no 'no (no no)                                              | 'tʃeɪs (chase)       |
| 'ðɪs (this)                                                     | 'no (no)                                                     | 'dɿmp (dump)         |
| 'pweɪsə (pretzels)                                              | 'æpəs'sɔs 'ja (applesauce yyy)                               | 'fɪnɪs (finish)      |
| 'wɑu (wow)                                                      | 'ɿt (yyy)                                                    | 'fɪt (fit)           |
| 'tʃɿkələt (chocolate)                                           | 'kændɪ (candy)                                               | 'hʌg (hug)           |
| 'ʃ:ɿklət (chocolate)                                            | 'dʒʊs (juice)                                                | 'lɪθ: (listen)       |
|                                                                 | 'wʊt (yyy)                                                   | 'laɪk (like)         |
|                                                                 |                                                              | 'pwi'te:nd (pretend) |
|                                                                 |                                                              | 'rɪp (rip)           |
|                                                                 |                                                              | 'ʃeɪk (shake)        |
|                                                                 |                                                              | 'teɪst (taste)       |
|                                                                 |                                                              | 'dʒɛntə (gentle)     |
|                                                                 |                                                              | 'wɪk (think)         |

|                   |                           |                                      |
|-------------------|---------------------------|--------------------------------------|
| 'wɪʃ (wish)       | 'aʊ: (our)                | ə 'bɪɡ 'tʃwaɪəŋɡə (a big triangle)   |
| 'ɪf (if)          | tə'naɪt (tonight)         | 'tʃwaɪəɪɡə: * (triangle xxx)         |
| 'wʊd (would)      | ə'gɛ: (yyy)               | 'twaɪəɪɡə (triangle)                 |
| 'nɪd (need)       | 'æftɜ: (after)            | 'sʌ ə 'bɪɡ * ə 'bɪɡ 'tʃwaɪəŋɡə (yyy) |
| 'kʊd (could)      | 'wɛt (wet)                | ↪ a big xxx a big triangle)          |
| 'm:ʌtʃ (much)     | 'tʌni (tiny)              | 'u: (ooh)                            |
| 'ɑ: (all)         | 'læst (last)              | ə 'bɪɡ 'sɜ:rkəl (a big circle)       |
| 'ʌndɜ: (under)    | 'hʌt (hot)                | ə 'bɪɡ 'tʃraɪ'εɪɡə ə 'bɪɡ 'skwe: (a  |
| 'daʊn (down)      | 'hæpi (happy)             | ↪ big triangle a big square)         |
| 'bi'saɪd (beside) | 'fæst (fast)              | 'u: (ooh)                            |
| 'we: (where)      | 'kɒtʰ (cold)              | ə 'bɪɡ 'oʊəl (a big oval)            |
| 'ʌs (us)          | 'ɔ: 'ɡʌn (all gone)       | 'o: (ooh)                            |
| 'ðɪs (this)       | 'ʃeɪps (shapes)           |                                      |
| 'ðɛm (them)       | ə 'tʃwaɪəɪɡə (a triangle) |                                      |

590

— (continued) —

591 **7.2 CHILDES**

592 A random sample of the transcripts used in this manuscript at different ages. Each line corresponds to an  
 593 utterance and each utterance is followed by transcribed part-of-speech tags.

594 **7.2.1 Eng-NA/Braunwald/010511.xml 17 months**

|                                    |                  |                                    |
|------------------------------------|------------------|------------------------------------|
| night_night (co)                   | yeah (co)        | she lives next door to us (pro:sub |
| night_night (co)                   | on (adv)         | ↪ v adj n prep pro:obj)            |
| here (adv)                         | Cee (n:prop)     | bow (on)                           |
| it is night_night (pro:per 0cop n) | spider (n)       | recorder (n)                       |
| Daddy (n:prop)                     | Cee (n:prop)     | cookie (n)                         |
| spiders (n)                        | down (adv)       | no (co)                            |
| oh (co)                            | byebye (co)      | Deedee (n:prop)                    |
| me Dwww (pro:obj n:prop)           | car (n)          | here (adv)                         |
| on (adv)                           | car (n)          | cookie (n)                         |
| on (unk)                           | there (adv)      | that that door (det:dem n)         |
| no (co)                            | byebye (co)      | that tata (comp chi)               |
| buttons (unk)                      | car (n)          | nose (n)                           |
| uh ()                              | car (n)          | eye (n)                            |
| down (adv)                         | baby (n)         | ear (n)                            |
| water (n)                          | night_night (co) | Laura (n:prop)                     |
| water (n)                          | night_night (co) | toe (n)                            |
| there (adv)                        | Cee (n:prop)     | tickle (n)                         |
| dance there (unk adv)              | cookie (unk)     | toe (n)                            |
| ahhah (co)                         | spoon (n)        | ah (co)                            |
| on (adv)                           | oh (co)          | uh ()                              |
| don't (mod~neg)                    | down (unk)       | toe (n)                            |
| give (v)                           | down (unk)       | recorder (unk)                     |
| I want (pro:sub v)                 | there (adv)      | toe (n)                            |
| Daddy (n:prop)                     | recorder (n)     | ah (co)                            |
| dance (n)                          | aya (bab)        | toe (n)                            |
| on (adv)                           | door (n)         | my toe (det:poss n)                |
| I want that that that that         | key (n)          | toe (n)                            |
| ↪ (0pro:sub v pro:dem)             | byebye (co)      | where (pro:rel)                    |
| eh ()                              | car (n)          | here (adv)                         |
| go in there (v prep n)             | kitty (n)        | no (co)                            |
| uhoh (co)                          | outside (adv)    | there (adv)                        |
| uhoh (co)                          | bow (on)         |                                    |
| uhoh (co)                          | bye (co)         |                                    |
| yeah (co)                          | byebye (co)      |                                    |
| thank you (v pro:per)              | bow (on)         |                                    |
| thank you (v pro:per)              | bow (on)         |                                    |

595

— (continued) —

596 **7.2.2 Brown/Adam/020801.xml 32 months**

|                                                                                                                                                                                                                                                                                                                                                                                                                                                                                                                                                                                                                                                                                                                                                                                                                                                                                                                                                                                                                                                                                                   |                                                                                                                                                                                                                                                                                                                                                                                                                                                                                                                                                                                                                                                                                                                                                                                                                                                                                                                                                                                                                                                                                                                                                                              |                                                                                                                                                                                                                                                                                                                                                                                                                                                                                                                                                                                                                                                                                                                                                                                                                                                                                                                                                                                                                                                                                                                                                                                                                                      |
|---------------------------------------------------------------------------------------------------------------------------------------------------------------------------------------------------------------------------------------------------------------------------------------------------------------------------------------------------------------------------------------------------------------------------------------------------------------------------------------------------------------------------------------------------------------------------------------------------------------------------------------------------------------------------------------------------------------------------------------------------------------------------------------------------------------------------------------------------------------------------------------------------------------------------------------------------------------------------------------------------------------------------------------------------------------------------------------------------|------------------------------------------------------------------------------------------------------------------------------------------------------------------------------------------------------------------------------------------------------------------------------------------------------------------------------------------------------------------------------------------------------------------------------------------------------------------------------------------------------------------------------------------------------------------------------------------------------------------------------------------------------------------------------------------------------------------------------------------------------------------------------------------------------------------------------------------------------------------------------------------------------------------------------------------------------------------------------------------------------------------------------------------------------------------------------------------------------------------------------------------------------------------------------|--------------------------------------------------------------------------------------------------------------------------------------------------------------------------------------------------------------------------------------------------------------------------------------------------------------------------------------------------------------------------------------------------------------------------------------------------------------------------------------------------------------------------------------------------------------------------------------------------------------------------------------------------------------------------------------------------------------------------------------------------------------------------------------------------------------------------------------------------------------------------------------------------------------------------------------------------------------------------------------------------------------------------------------------------------------------------------------------------------------------------------------------------------------------------------------------------------------------------------------|
| <p>this is heavy (pro:dem cop adj)<br/> saggy baggy doesn't eat a all up<br/> → (adj adj mod~neg v det:art<br/> → qn adv)<br/> oh no (co co)<br/> le me (v pro:obj)<br/> you going faster (pro:per part<br/> → adj)<br/> washer (n)<br/> going go little (part v adv adj)<br/> what is what de the in (pro:int<br/> → det:art det:art prep n)<br/> pocket (n)<br/> dis this one (pro:dem pro:dem<br/> → pro:indef)<br/> booking (chi)<br/> booking booking booking<br/> → booking (chi chi chi chi)<br/> booking booking (chi chi)<br/> tease book tease (n n n)<br/> tease (n)<br/> tease (n)<br/> tease tease (n n)<br/> teasing teasing teasing (part part<br/> → part)<br/> teasing (part)<br/> teasing (part)<br/> tease a Cromer (v det:art n:prop)<br/> what this is car (pro:int det:dem<br/> → aux n)<br/> pin (n)<br/> yeah Mommy pin (co n:prop n)<br/> car (n)<br/> yeah (co)<br/> red car (adj n)<br/> yellow car (n n)<br/> watch (n)<br/> where horses go (pro:int n v)<br/> where horses (pro:int n)<br/> horse go yes Mommy (n v co<br/> → n:prop)<br/> did he (mod pro:sub)</p> | <p>there he is Mommy (adv pro:sub<br/> → cop n:prop)<br/> corral corral (n n)<br/> baby horses (n n)<br/> horses (n)<br/> baby horses (n n)<br/> ready me go (v pro:obj v)<br/> ready me (v pro:obj)<br/> go down dere there (v prep n n)<br/> go down right side (v adv adj n)<br/> switch (n)<br/> doing switch (part n)<br/> trick (n)<br/> doin trick (part n)<br/> doing chair tricks (part n n)<br/> yeah funny (co adj)<br/> chair trick laughing (n n part)<br/> chair tricks (n v)<br/> Mommy chair tricks (n:prop v n<br/> → n)<br/> chair tricks chair tricks chair<br/> → tricks (n v n v n n)<br/> press a button (v det:art n)<br/> press a button (v det:art n)<br/> yeah (co)<br/> what a happen have a tail<br/> → (pro:int det:art v v det:art n)<br/> yeah (co)<br/> press a button (v det:art n)<br/> doing rope tricks (part n n)<br/> rope tricks (n v)<br/> watch it rope tricks (v pro:per n<br/> → n)<br/> yeah (co)<br/> watch it (v pro:per)<br/> car car (n n)<br/> fell down Mommy's floor (v prep<br/> → adj n)<br/> throw dat that (v pro:dem<br/> → pro:dem)<br/> what dat that (pro:int adv adv)<br/> tricks (n)<br/> yep tricks (co v)</p> | <p>press a button (v det:art n)<br/> okay de the horses tail (co det:art<br/> → det:art n n)<br/> okay horses (co n)<br/> okay horses okay horses (co n adj<br/> → n)<br/> good night rope tricks (adj n n n)<br/> good night my rope tricks (adj n<br/> → det:poss n n)<br/> yeah rope tricks (co n n)<br/> rope trick fell down (n n v adv)<br/> go tired go tired (v part v part)<br/> Mommy Mommy (n:prop n:prop)<br/> holler doesn't fit in (v mod~neg<br/> → v prep n)<br/> horse fit in (n v adv prep adv)<br/> ropes (n)<br/> Mommy roller will stand up<br/> → (n:prop n mod v adv)<br/> try him dere there (v pro:obj adv<br/> → adv)<br/> Mommy Mommy (n:prop n:prop)<br/> will fit in (mod n prep n)<br/> see (v)<br/> le me do rope tricks (v pro:obj v<br/> → n n)<br/> let me do ropes (v pro:obj v n)<br/> hello hello hello (co n n)<br/> what dat that Mommy cowboy<br/> → (pro:int adv adv n:prop n)<br/> hello cowboy (co n)<br/> wh cowboy (pro:int v n)<br/> wh cowboy (pro:int v n)<br/> happen to him (v prep pro:obj)<br/> wh him (pro:int v pro:obj)<br/> yeah (co)<br/> happen cow watching Rusty<br/> → down (v n part n:prop adv<br/> → prep adv)<br/> see him down there (v pro:obj<br/> → prep n)</p> |
|---------------------------------------------------------------------------------------------------------------------------------------------------------------------------------------------------------------------------------------------------------------------------------------------------------------------------------------------------------------------------------------------------------------------------------------------------------------------------------------------------------------------------------------------------------------------------------------------------------------------------------------------------------------------------------------------------------------------------------------------------------------------------------------------------------------------------------------------------------------------------------------------------------------------------------------------------------------------------------------------------------------------------------------------------------------------------------------------------|------------------------------------------------------------------------------------------------------------------------------------------------------------------------------------------------------------------------------------------------------------------------------------------------------------------------------------------------------------------------------------------------------------------------------------------------------------------------------------------------------------------------------------------------------------------------------------------------------------------------------------------------------------------------------------------------------------------------------------------------------------------------------------------------------------------------------------------------------------------------------------------------------------------------------------------------------------------------------------------------------------------------------------------------------------------------------------------------------------------------------------------------------------------------------|--------------------------------------------------------------------------------------------------------------------------------------------------------------------------------------------------------------------------------------------------------------------------------------------------------------------------------------------------------------------------------------------------------------------------------------------------------------------------------------------------------------------------------------------------------------------------------------------------------------------------------------------------------------------------------------------------------------------------------------------------------------------------------------------------------------------------------------------------------------------------------------------------------------------------------------------------------------------------------------------------------------------------------------------------------------------------------------------------------------------------------------------------------------------------------------------------------------------------------------|

597

— (continued) —

598 **7.2.3 Eng-NA/Carterette/first.xml 72 months**

|                                                                                                                                                                                                                                                        |                                                                                                                                                                                                                                                                                                                                     |                                                                                                                                                                                                                                                                                                                                     |
|--------------------------------------------------------------------------------------------------------------------------------------------------------------------------------------------------------------------------------------------------------|-------------------------------------------------------------------------------------------------------------------------------------------------------------------------------------------------------------------------------------------------------------------------------------------------------------------------------------|-------------------------------------------------------------------------------------------------------------------------------------------------------------------------------------------------------------------------------------------------------------------------------------------------------------------------------------|
| <p>you mean uh um like England or<br/> → something (pro:per v conj<br/> → n:prop coord pro:indef)<br/> when we walk home from school<br/> → I walk home with two<br/> → friends (conj pro:sub v n<br/> → prep n pro:sub n n prep<br/> → det:num n)</p> | <p>and sometimes we can't run<br/> → home from school though<br/> → (coord adv pro:sub<br/> → mod~neg v adv prep n adv)<br/> because um one girl where every<br/> → time she wants to runs she<br/> → gets the wheezes and stuff<br/> → (conj det:num n pro:rel qn n<br/> → pro:sub v inf v pro:sub v<br/> → det:art v coord n)</p> | <p>and then she can't breathe very<br/> → well and she gets sick (coord<br/> → adv:tem pro:sub mod~neg v<br/> → adv adv coord pro:sub v adj)<br/> that's why we can't run<br/> → (pro:dem~cop pro:int<br/> → pro:sub mod~neg v)<br/> I like to go to my grandmother's<br/> → house (pro:sub v inf v prep<br/> → det:poss adj n)</p> |
|--------------------------------------------------------------------------------------------------------------------------------------------------------------------------------------------------------------------------------------------------------|-------------------------------------------------------------------------------------------------------------------------------------------------------------------------------------------------------------------------------------------------------------------------------------------------------------------------------------|-------------------------------------------------------------------------------------------------------------------------------------------------------------------------------------------------------------------------------------------------------------------------------------------------------------------------------------|

well because she gives us candy  
 ↳ (co conj pro:sub v pro:obj n)  
 well um we eat there sometimes  
 ↳ (co pro:sub v adv adv)  
 sometimes we sleep overnight  
 ↳ there (adv pro:sub v adv  
 ↳ adv)  
 sometime when I go to go to my  
 ↳ cousin's I get to play softball  
 ↳ or play badminton and all  
 ↳ that (adv conj pro:sub v inf v  
 ↳ prep det:poss adj pro:sub v  
 ↳ prep n n coord n n coord qn  
 ↳ pro:dem)  
 thing I hate to play is doctor (n  
 ↳ pro:sub v prep n cop v)  
 oh (co)  
 I hate to play doctor or house or  
 ↳ that (pro:sub v prep n n  
 ↳ coord n coord pro:dem)  
 don't like it or stuff (mod~neg v  
 ↳ pro:per coord n)  
 we've been learning a lot of  
 ↳ Spanish words (pro:sub~aux  
 ↳ aux part qn n:prop n)  
 our teacher speaks Spanish  
 ↳ sometimes (det:poss n v  
 ↳ n:prop adv)  
 so does my father (adv v det:poss  
 ↳ n)  
 yyy ()  
 well my father doesn't know very  
 ↳ much Spanish (co det:poss n  
 ↳ mod~neg v adv adv n:prop)  
 but he doesn't know what gray is  
 ↳ in Spanish (conj pro:sub  
 ↳ mod~neg v pro:int adj aux  
 ↳ prep n:prop)  
 and its (coord det:poss L2)  
 and he doesn't and he knows  
 ↳ what blue is in Spanish  
 ↳ (coord pro:sub v pro:int n  
 ↳ cop prep n:prop)  
 and he knows what um red is  
 ↳ (coord pro:sub v pro:int n  
 ↳ cop)  
 in Spanish (prep n:prop)  
 and sometimes I like to go to  
 ↳ Mexico but I've never been  
 ↳ there before (coord adv  
 ↳ pro:sub v inf v prep n:prop  
 ↳ conj pro:sub~aux adv cop  
 ↳ adv adv)  
 only when I was a little teeny  
 ↳ baby I been there and I don't  
 ↳ even remember it (adv conj  
 ↳ pro:sub cop det:art adj adj n  
 ↳ pro:sub cop adv coord  
 ↳ pro:sub mod~neg adv v  
 ↳ pro:per)  
 there this one night I couldn't get  
 ↳ any food (adv pro:dem  
 ↳ pro:indef n pro:sub  
 ↳ mod~neg v qn n)  
 I mean there was this one day I  
 ↳ couldn't get any food at  
 ↳ home unless I asked it for  
 ↳ Spanish (pro:sub v adv cop  
 ↳ det:dem det:num n pro:sub  
 ↳ mod~neg v qn n prep adv  
 ↳ conj pro:sub v pro:per prep  
 ↳ n:prop)  
 my um my mother and father is  
 ↳ going to pretty soon take us  
 ↳ to Philadelphia (det:poss  
 ↳ det:poss n coord n aux part  
 ↳ inf adj adv v pro:obj prep  
 ↳ n:prop)  
 and we're going to see our  
 ↳ grandmother there (coord  
 ↳ pro:sub~aux part inf v  
 ↳ det:poss n adv)  
 I wish we went to (pro:sub v  
 ↳ pro:sub v prep)  
 uh we went to Mexico not  
 ↳ Mexico San\_Diego once  
 ↳ (pro:sub v prep n:prop adv)  
 and they had a little um pool that  
 ↳ was full of water and it was  
 ↳ two feet (coord pro:sub v  
 ↳ det:art adj n pro:rel cop adj  
 ↳ prep n coord pro:per cop  
 ↳ det:num n)  
 and then they and then they had  
 ↳ another pool (coord adv:tem  
 ↳ pro:sub v qn n)  
 it was five feet eight feet (pro:per  
 ↳ cop det:num n det:num n)  
 Randy my brother went in eight  
 ↳ feet and I went in five feet  
 ↳ (n:prop det:poss n v prep  
 ↳ det:num n coord pro:sub v  
 ↳ prep det:num n)  
 and I think there was a three feet  
 ↳ (coord pro:sub v adv cop  
 ↳ det:art det:num n)  
 there was (pro:exist cop)  
 and I jumped off and I uh and I  
 ↳ jumped off the edge of the  
 ↳ swimming pool (coord  
 ↳ pro:sub v prep det:art n prep  
 ↳ det:art n:gerund n)  
 I got on the edge and I jumped  
 ↳ off (pro:sub v prep det:art n  
 ↳ coord pro:sub v adv)  
 and then I holded held on to a  
 ↳ edge because I couldn't swim  
 ↳ very well (coord adv:tem  
 ↳ pro:sub v v adv prep det:art  
 ↳ n conj pro:sub mod~neg v  
 ↳ adv adv)  
 when I start when I started to  
 ↳ swim I was always holding  
 ↳ on to the edge (conj pro:sub  
 ↳ v inf v pro:sub aux adv part  
 ↳ adv prep det:art n)  
 I wouldn't dare to go more than  
 ↳ this away from the edge or  
 ↳ else I I'd I'd start jumping  
 ↳ dancing into the water  
 ↳ (pro:sub mod~neg v inf v qn  
 ↳ prep pro:dem adv prep  
 ↳ det:art n coord post  
 ↳ pro:sub~mod v part part  
 ↳ prep det:art n)  
 when my father wanted to take a  
 ↳ picture of me with you know  
 ↳ one of those floating things  
 ↳ one of those floating rings  
 ↳ that you put around you but  
 ↳ I don't wanna because  
 ↳ you know I know how to  
 ↳ swim (conj det:poss n v inf v  
 ↳ det:art n prep pro:obj prep  
 ↳ co det:num prep det:dem  
 ↳ part n pro:indef prep  
 ↳ det:dem part n pro:rel  
 ↳ pro:per v prep pro:per conj  
 ↳ pro:sub mod~neg v~inf  
 ↳ conj co pro:sub v pro:int inf  
 ↳ v)  
 but when I took it off I almost  
 ↳ drowned drowned (conj  
 ↳ conj pro:sub v pro:per adv  
 ↳ pro:sub adv part part)  
 and I was jumping up and down  
 ↳ to see if I could swim or not  
 ↳ (coord pro:sub aux part adv  
 ↳ coord adv inf v conj pro:sub  
 ↳ mod v coord neg)  
 and (coord)



|                                      |                                    |                                    |
|--------------------------------------|------------------------------------|------------------------------------|
| um I live in an apartment and we     | then he goes to bed then he        | you said put him back in your      |
| ↪ have a big pool and it's eight     | ↪ finally gets to sleep (adv:tem   | ↪ crib (pro:per v v pro:obj adv    |
| ↪ and a half in part and four        | ↪ pro:sub v prep n adv:tem         | ↪ prep det:poss n)                 |
| ↪ and a half and three and a         | ↪ pro:sub adv v prep n)            | I mean in his crib (pro:sub v prep |
| ↪ half (pro:sub v prep det:art n     | can't go to sleep in about a hour  | ↪ det:poss n)                      |
| ↪ coord pro:sub v det:art adj n      | ↪ (mod~neg v inf v adv prep        | I don't have a crib (pro:sub       |
| ↪ coord pro:per~cop det:num          | ↪ det:art n)                       | ↪ mod~neg v det:art n)             |
| ↪ coord det:art n prep n coord       | not with that in the house (neg    | uh sometimes I like to go to the I |
| ↪ det:num coord det:art n            | ↪ prep pro:dem prep det:art n)     | ↪ like to go to my                 |
| ↪ coord det:num coord det:art        | it would just take two minutes to  | ↪ grandmothers (adv pro:sub v      |
| ↪ n)                                 | ↪ get to sleep (pro:per mod        | ↪ inf v prep det:poss n)           |
| and this summer I get to go          | ↪ adv v det:num n inf v prep       | I would like to sleep over her at  |
| ↪ swimming in it (coord              | ↪ n)                               | ↪ her house every day because      |
| ↪ det:dem n pro:sub v inf v          | just about two minutes (adv prep   | ↪ she lets me stay up late         |
| ↪ part prep pro:per)                 | ↪ det:num n)                       | ↪ about ten o'clock or twelve      |
| in the summer we go swimming         | if you just um why don't you get   | ↪ thirty (pro:sub mod v inf v      |
| ↪ (prep det:art n pro:sub v          | ↪ some cotton and plug it in       | ↪ adv prep det:poss n qn n         |
| ↪ part)                              | ↪ your ears and then you can't     | ↪ conj pro:sub v pro:obj v adv     |
| and that's when my birthday is       | ↪ hear him (pro:int mod~neg        | ↪ adv prep det:num n coord         |
| ↪ (coord pro:dem~cop conj            | ↪ pro:per v qn n coord v           | ↪ det:num det:num)                 |
| ↪ det:poss n cop)                    | ↪ pro:per prep det:poss n          | you're lucky (pro:per~cop adj)     |
| we don't go in spring or winter      | ↪ coord adv:tem pro:per            | I only get to stay up until eight  |
| ↪ because it's too cold (pro:sub     | ↪ mod~neg v pro:obj)               | ↪ (pro:sub adv v inf v adv prep    |
| ↪ mod~neg v prep n coord n           | he makes so much noise he          | ↪ det:num)                         |
| ↪ conj pro:per~cop adv adv)          | ↪ makes so much noise it           | and I only get to stay up until    |
| my my brother can go swimming        | ↪ probably sound effect            | ↪ nine (coord pro:sub adv v inf    |
| ↪ in the winter though because       | ↪ through it (pro:sub v adv qn     | ↪ v adv prep det:num)              |
| ↪ he gots got his tonsils out        | ↪ n pro:per adv adj n prep         | I get to stay up until um say      |
| ↪ you know (det:poss n mod v         | ↪ pro:per)                         | ↪ about between ten o'clock        |
| ↪ part prep det:art n adv conj       | well what does the baby do (co     | ↪ and nine thirty (pro:sub v inf   |
| ↪ pro:sub v v det:poss n adv         | ↪ pro:int v det:art n v)           | ↪ v adv prep v adv prep            |
| ↪ co)                                | come out get out crawl out of his  | ↪ det:num n coord det:num          |
| and he and he gets sick uh sick      | ↪ crib and then come along in      | ↪ det:num)                         |
| ↪ um once in a few years             | ↪ your bed and pull out your       | uh and sometimes sometimes I       |
| ↪ (coord pro:sub v adj adv           | ↪ ear (v adv v adv n prep          | ↪ get to go to bed at twelve       |
| ↪ prep det:art qn n)                 | ↪ det:poss n coord adv:tem v       | ↪ thirty (coord adv pro:sub v      |
| I get sick just about every day      | ↪ adv prep det:poss n coord v      | ↪ inf v prep n prep det:num        |
| ↪ (pro:sub v adj adv prep qn n)      | ↪ adv det:poss n)                  | ↪ det:num)                         |
| there's just one thing I can't stand | once once he keep jump jumping     | sometimes but most of the times    |
| ↪ in my family (pro:exist~cop        | ↪ jumping and then this thing      | ↪ I don't (adv conj qn prep        |
| ↪ adj det:num n pro:sub              | ↪ slide down (adv pro:sub v        | ↪ det:art n pro:sub mod~neg)       |
| ↪ mod~neg v prep det:poss n)         | ↪ part coord adv:tem det:dem       | on holidays and you know like      |
| my baby makes too much noise         | ↪ n n adv)                         | ↪ um weekends (prep n coord        |
| ↪ (det:poss n v adv qn n)            | and then he fell over to the other | ↪ co prep n)                       |
| I can't even get get to sleep for a  | ↪ bed and he start crying          | on holidinna holidays and I mean   |
| ↪ minute (pro:sub mod~neg            | ↪ (coord adv:tem pro:sub v adv     | ↪ on holidays I get to stay up     |
| ↪ adv v prep n prep det:art n)       | ↪ prep det:art qn n coord          | ↪ all night (prep n n coord        |
| he won't stop jumping around in      | ↪ pro:sub v part)                  | ↪ pro:sub v prep n pro:sub v       |
| ↪ the bath (pro:sub mod~neg          | and I couldn't get to bed so I I   | ↪ inf v adv qn n)                  |
| ↪ v part adv prep det:art n)         | ↪ hafta wake up put him back       | uh on weekends like when I'm       |
| in the bath (prep det:art n)         | ↪ in my crib (coord pro:sub        | ↪ not going to school (prep n      |
| no (co)                              | ↪ mod~neg v prep n conj            | ↪ prep conj pro:sub~aux neg        |
| in the crib (prep det:art n)         | ↪ pro:sub mod~inf v adv v          | ↪ part prep n)                     |
| he he keeps jumping around gets      | ↪ pro:obj adv prep det:poss n)     | see this day I'm going to school   |
| ↪ tired (pro:sub v part adv v        | in your crib (prep det:poss n)     | ↪ and then the next day you        |
| ↪ part)                              | no not in my crib (co neg prep     | ↪ don't hafta (v det:dem n         |
|                                      | ↪ det:poss n)                      | ↪ pro:sub~aux part prep n          |
|                                      | I don't have a crib (pro:sub       | ↪ coord adv:tem det:art adj n      |
|                                      | ↪ mod~neg v det:art n)             | ↪ pro:per mod~neg mod~inf)         |

|                                  |                                 |                                  |
|----------------------------------|---------------------------------|----------------------------------|
| I can stay up late because I the | every holiday um um my my       | about just twenty days or twenty |
| → next day I can sleep all I     | → grandmother and my aunt       | → one (adv adv det:num n         |
| → want (pro:sub mod v adv        | → come over (qn n det:poss n    | → coord det:num det:num)         |
| → adv conj pro:sub det:art adj   | → coord det:poss n v adv)       | on Easter I hafta get all this   |
| → n pro:sub mod n adv pro:sub    | well you know it's because well | → gooshy egg (prep n:prop        |
| → v)                             | → you know it's just about      | → pro:sub mod~inf v qn           |
| that's why we hafta go to bed    | → becoming Easter (co co        | → det:dem adj n)                 |
| → early on school days           | → pro:per~cop conj adv co       |                                  |
| → (pro:dem~cop pro:int           | → pro:per~aux adj adv part      | 599 ——— (continued) ———          |
| → pro:sub mod~inf v prep n       | → n:prop)                       |                                  |
| → adv prep n n)                  |                                 |                                  |

600 **7.3 *Drosophila***

601 One hour of behavioral state transitions from a single example *Drosophila*. There are 117 unique behavior  
 602 states. Behavioral states do not have names but belong to broad categories (Posterior, Side Legs, Anterior,  
 603 Locomotion, Idle, Slow).

|                             |                            |                               |
|-----------------------------|----------------------------|-------------------------------|
| 59 43 11 21 11 51 52 46 52  | 34 39 43 52 43 52 60 53 59 | 29 38 20 28 35 27 35 27 20    |
| 60 59 65 46 27 32 33 40 52  | 46 66 27 47 49 35 47 49 1  | 38 15 46 15 32 44 27 19 46    |
| 43 39 43 76 106 76 52 43 9  | 38 14 38 50 19 25 49 7 38  | 49 47 49 35 49 47 49 44 32    |
| 4 9 21 9 21 11 21 69 59     | 46 15 22 32 38 44 46 15 38 | 49 44 35 49 44 38 5 6 14      |
| 46 42 52 43 9 21 4 9 10     | 35 38 32 44 65 49 44 46 47 | 35 22 14 20 28 35 49 35 19    |
| 52 46 80 69 80 84 103 60 43 | 69 59 52 43 39 21 10 4 9   | 35 49 44 49 20 49 1 15 14     |
| 9 21 4 21 52 69 66 46 52    | 11 4 9 4 10 4 39 40 33     | 38 28 14 38 25 20 25 49 25    |
| 43 21 43 52 53 60 59 68 46  | 19 27 46 27 32 33 45 40 33 | 35 27 44 27 25 20 46 49 35    |
| 52 40 52 39 43 21 10 21 43  | 46 33 65 71 79 71 87 84 69 | 27 49 47 49 35 49 57 65 44    |
| 52 43 52 76 52 31 9 10 9    | 79 46 54 32 22 46 15 27 44 | 56 46 35 47 65 50 59 41 49    |
| 10 9 4 43 52 48 59 32 65    | 27 35 49 20 19 46 27 15 29 | 44 22 29 25 14 27 14 27 1     |
| 38 45 52 45 33 46 33 40 52  | 14 20 28 35 15 44 28 50 47 | 2 1 2 1 15 20 38 27 46        |
| 39 4 43 52 65 53 60 52 43   | 49 57 41 37 52 51 61 49 65 | 19 27 35 38 46 49 25 49 28    |
| 4 9 4 10 21 51 43 52 53     | 43 51 21 39 52 66 68 65 49 | 14 38 20 6 38 46 15 35 49     |
| 65 46 55 52 43 21 9 10 21   | 46 19 40 31 21 10 21 4 21  | 44 15 7 15 38 14 8 7 38       |
| 4 43 40 32 33 49 46 15 33   | 39 20 28 20 32 33 22 35 28 | 46 25 38 25 38 28 14 19 25    |
| 39 51 4 9 43 52 53 59 65    | 46 19 38 36 46 65 66 65 68 | 15 14 38 27 14 1 2 15 38      |
| 59 65 45 52 43 52 60 62 65  | 45 49 47 49 44 50 46 68 69 | 14 38 14 19 14 19 38 19 27    |
| 62 60 52 48 21 9 51 43 52   | 87 77 87 84 87 77 87 79 46 | 38 19 49 46 49 65 49 65 69    |
| 53 50 46 68 59 50 46 27 69  | 27 20 30 38 46 49 65 49 41 | 44 46 20 38 15 33 45 55 59    |
| 80 65 68 59 49 57 66 59 65  | 32 45 65 56 49 65 49 57 44 | 41 36 79 38 46 20 14 15 32    |
| 49 44 41 44 46 48 53 59 66  | 46 27 23 34 31 39 21 39 19 | 13 15 38 29 84 46 90 105 84   |
| 65 66 59 67 77 60 43 52 59  | 38 19 40 34 33 32 15 35 38 | 115 87 55 59 75 98 103 93 75  |
| 65 59 69 77 53 55 59 64 54  | 36 46 44 66 35 49 28 15 47 | 90 46 99 87 107 115 65 59 32  |
| 65 44 46 65 50 65 49 32 59  | 15 14 27 46 49 14 1 2 14   | 46 20 38 15 13 23 33 34 40    |
| 50 44 49 47 50 65 69 53 52  | 19 15 14 38 15 13 19 38 46 | 39 31 52 48 59 65 59 46 44    |
| 43 51 21 51 57 39 43 52 65  | 20 15 38 20 38 65 49 27 46 | 109 105 93 76 87 103 93 84 65 |
| 52 45 65 66 43 53 65 80 53  | 32 33 21 10 9 21 9 21 9    | 98 59 45 53 65 46 45 33 52    |
| 43 21 39 71 52 43 52 55 66  | 11 9 10 9 11 9 21 43 52    | 3 10 9 11 21 11 9 11 9        |
| 46 55 53 52 43 52 43 52 60  | 34 32 49 46 27 32 23 33 40 | 11 9 3 11 9 3 10 4 9          |
| 77 60 67 71 84 106 98 87 84 | 39 21 9 21 9 21 43 52 53   | 21 4 10 21 9 21 9 10 9        |
| 93 108 93 67 87 67 60 52 53 | 68 49 46 27 32 39 43 21 43 |                               |
| 59 65 59 48 52 39 21 9 11   | 52 48 40 44 49 44 32 46 45 |                               |
| 21 11 31 52 45 65 59 52 43  | 65 59 80 46 33 32 52 49 52 |                               |
| 52 53 59 69 27 46 27 15 32  | 45 65 52 45 49 32 46 38 46 | 604 ——— (continued) ———       |

605 **7.4 Zebrafish**

606 Behavioral states for zebrafish. Several behavioral contexts are used in this dataset. The example behavioral  
 607 sequence shown below is acquired during a phototaxis paradigm (SCS: Short Capture Swims; LCS: Long  
 608 Capture Swims; BS: Burst type forward Swim with high tail-beat frequency; SLC: Fast C-start escape Swims;

609 RT: Routine Turns; LLC: Long Latency C-starts; AS: Approach Swims; SAT: Spot Avoidance Turn; HAT:  
610 High Angle Turn).

|                                                                                                                                                                                                                                                                                                                                                                                                                                                                                                                                                                                                                                                                                                                                                                                                                                                                                                                                                                                                                                                                                                                                       |                                                                                                                                                                                                                                                                                                                                                                                                                                                                                                                                                                                                                                                                                                                                                                                                                                                                                                                                                                                                                                                                            |                                                                                                                                                                                                                                                                                                                                                                                                                                                                                                                                                                                                                                                                                                                                                                                                                                                                                                                                                                    |
|---------------------------------------------------------------------------------------------------------------------------------------------------------------------------------------------------------------------------------------------------------------------------------------------------------------------------------------------------------------------------------------------------------------------------------------------------------------------------------------------------------------------------------------------------------------------------------------------------------------------------------------------------------------------------------------------------------------------------------------------------------------------------------------------------------------------------------------------------------------------------------------------------------------------------------------------------------------------------------------------------------------------------------------------------------------------------------------------------------------------------------------|----------------------------------------------------------------------------------------------------------------------------------------------------------------------------------------------------------------------------------------------------------------------------------------------------------------------------------------------------------------------------------------------------------------------------------------------------------------------------------------------------------------------------------------------------------------------------------------------------------------------------------------------------------------------------------------------------------------------------------------------------------------------------------------------------------------------------------------------------------------------------------------------------------------------------------------------------------------------------------------------------------------------------------------------------------------------------|--------------------------------------------------------------------------------------------------------------------------------------------------------------------------------------------------------------------------------------------------------------------------------------------------------------------------------------------------------------------------------------------------------------------------------------------------------------------------------------------------------------------------------------------------------------------------------------------------------------------------------------------------------------------------------------------------------------------------------------------------------------------------------------------------------------------------------------------------------------------------------------------------------------------------------------------------------------------|
| <p>SAT RT S2 RT S1 S1 RT RT<br/>HAT S1 RT RT RT RT RT RT<br/>RT RT S1 S1 HAT RT SAT S2<br/>S2 RT RT RT S2 RT S2 S2<br/>HAT RT SAT RT S1 RT S1 S2<br/>HAT S1 HAT S1 S1 S1 RT S1<br/>HAT RT HAT HAT S2 RT HAT S2<br/>S2 RT RT S1 S2 RT S2 RT<br/>S1 RT SAT S2 SAT RT RT S2<br/>S2 O-bend S1 S2 RT S2 RT S2<br/>RT S2 S2 RT S2 S2 S2 RT<br/>S2 S2 S2 S1 S1 RT RT HAT<br/>RT S2 S1 S2 S2 S2 RT RT<br/>S2 S1 RT RT S2 S2 S2 S2<br/>RT S2 RT RT S2 RT RT S2<br/>RT RT S2 S2 S2 S2 S2 S2<br/>RT S2 HAT HAT RT S1 S2 RT<br/>SAT S2 S2 S2 S2 RT S1 RT<br/>S1 RT S1 S2 S2 S2 S1 S2<br/>S2 S2 J-turn HAT S2 RT S2 S1<br/>S2 RT RT S2 RT RT HAT S2<br/>O-bend HAT S1 S2 S2 S2 S2 S2<br/>S2 S2 S2 RT RT S2 RT HAT<br/>S2 S1 S1 RT RT RT RT RT<br/>RT HAT RT S2 RT RT HAT S1<br/>S1 S1 RT S2 S2 RT S2 SAT<br/>S2 S2 S1 S2 J-turn RT RT HAT<br/>RT S2 S2 S2 HAT RT S2 S2<br/>S2 S2 S2 HAT S1 RT HAT S1<br/>S1 S2 AS HAT S1 S2 S1 RT<br/>HAT RT S1 S1 RT S1 S2 S2<br/>RT RT S2 S1 S2 S2 S1 J-turn<br/>S2 S2 RT RT S1 S1 S2 RT<br/>S2 S1 HAT S1 AS RT RT RT<br/>S2 S2 HAT AS RT S2 RT S1<br/>RT S2 RT S2 RT RT RT S1<br/>S1 S1 S2 HAT S1 AS RT HAT</p> | <p>RT RT S2 S2 S2 S2 RT S2<br/>RT HAT S2 RT S2 RT S2 S2<br/>RT HAT S1 S1 S2 RT RT RT<br/>HAT S1 HAT S2 S2 RT J-turn S2<br/>S2 S2 RT S1 S2 S2 RT RT<br/>HAT S1 S2 RT RT HAT HAT S1<br/>S2 S2 S2 S2 S2 S2 S2<br/>RT S1 S1 S1 HAT HAT S2 HAT<br/>S2 HAT S2 S2 S2 S2 S2 RT<br/>HAT S1 S1 S2 S2 HAT S1 RT<br/>SCS J-turn S2 HAT S1 S2 S2 S2<br/>S2 RT S1 RT S1 AS J-turn RT<br/>RT RT RT O-bend J-turn S1 RT<br/>→ RT<br/>RT S2 S2 RT S2 RT O-bend S2<br/>S2 S2 S2 S2 J-turn RT RT S2<br/>S2 HAT S1 J-turn RT S2 S2 S2<br/>S1 S2 S2 RT S2 S2 S2 RT<br/>RT S1 S2 S2 S1 S2 HAT S1<br/>RT S2 S2 S2 RT RT HAT S1<br/>SAT HAT HAT S2 S2 HAT HAT<br/>→ S1<br/>S2 S2 S2 S2 S1 S2 S1 S1<br/>S2 S1 S1 RT S2 S2 RT RT<br/>S1 S2 HAT S1 O-bend RT S1 S2<br/>RT RT RT S1 S1 HAT SAT S1<br/>S2 S2 S2 S2 S2 S2 S2 S2<br/>S2 S2 RT HAT S1 S2 S1 RT<br/>S1 S2 S2 S2 S2 RT S2 RT<br/>RT HAT S1 RT RT S2 HAT S1<br/>RT RT RT J-turn AS S2 S1 RT<br/>S2 RT RT S1 S1 S1 S2 RT<br/>HAT RT RT HAT S1 S1 S1 RT<br/>S2 S2 HAT RT RT S1 HAT RT<br/>S2 RT S2 S2 S2 S2 SAT<br/>S2 S2 S2 S2 RT S2 S2 RT</p> | <p>S2 S2 RT S2 S2 RT HAT S1<br/>J-turn S2 RT S2 HAT S1 S2<br/>→ J-turn<br/>RT S1 RT S2 J-turn HAT RT S2<br/>RT SAT S2 RT HAT HAT S2 S2<br/>S2 HAT S1 S1 S2 S2 RT RT<br/>S2 HAT S1 HAT J-turn S1 RT S2<br/>S2 HAT S2 RT J-turn J-turn SCS<br/>→ S2<br/>J-turn J-turn S1 SAT S2 RT RT S2<br/>S2 J-turn RT S2 RT S2 HAT HAT<br/>S2 S2 S2 S2 SAT S1 S1 S2<br/>S2 RT SAT S1 RT RT S1 S2<br/>S1 S2 S1 S1 S1 S1 S2<br/>S1 RT S2 S2 RT RT S2 S2<br/>S1 S2 S2 S2 S2 S2 S2 S2<br/>S2 S2 RT S2 S2 RT RT<br/>S1 RT RT S2 S2 HAT RT HAT<br/>S1 S2 S2 S2 S2 S2 S2 S2<br/>S2 S2 S2 RT RT S2 RT HAT<br/>S1 RT S1 S2 RT S2 S1 RT<br/>S2 S2 S2 S2 RT S2 S2 S2<br/>RT RT S2 S2 HAT RT S1 HAT<br/>SAT RT RT S2 S1 S1 S2 S2<br/>S2 J-turn S1 HAT HAT S1 RT<br/>→ HAT<br/>S2 RT S2 J-turn AS S1 S2 S1<br/>S2 S2 S1 RT HAT S2 S2 S2<br/>S2 HAT S1 S1 RT RT S2 RT<br/>S1 RT J-turn HAT S1 S1 RT S2<br/>S2 S2 S2 S2 S2 S2 S1<br/>S1 HAT HAT S2 S1 S1 S1 S1<br/>HAT RT S1 RT S1 S1 S2 S2</p> |
|---------------------------------------------------------------------------------------------------------------------------------------------------------------------------------------------------------------------------------------------------------------------------------------------------------------------------------------------------------------------------------------------------------------------------------------------------------------------------------------------------------------------------------------------------------------------------------------------------------------------------------------------------------------------------------------------------------------------------------------------------------------------------------------------------------------------------------------------------------------------------------------------------------------------------------------------------------------------------------------------------------------------------------------------------------------------------------------------------------------------------------------|----------------------------------------------------------------------------------------------------------------------------------------------------------------------------------------------------------------------------------------------------------------------------------------------------------------------------------------------------------------------------------------------------------------------------------------------------------------------------------------------------------------------------------------------------------------------------------------------------------------------------------------------------------------------------------------------------------------------------------------------------------------------------------------------------------------------------------------------------------------------------------------------------------------------------------------------------------------------------------------------------------------------------------------------------------------------------|--------------------------------------------------------------------------------------------------------------------------------------------------------------------------------------------------------------------------------------------------------------------------------------------------------------------------------------------------------------------------------------------------------------------------------------------------------------------------------------------------------------------------------------------------------------------------------------------------------------------------------------------------------------------------------------------------------------------------------------------------------------------------------------------------------------------------------------------------------------------------------------------------------------------------------------------------------------------|

611 ——— (continued) ———

612 **7.5 Epic Kitchens**

613 Each transcript in Epic Kitchens contains a sequence of behaviors consisting of an action and object. One  
614 example sequence is shown below.

|                                                                                                                                                                                                      |                                                                                                                                                                                                                                    |                                                                                                                                                                                                                     |
|------------------------------------------------------------------------------------------------------------------------------------------------------------------------------------------------------|------------------------------------------------------------------------------------------------------------------------------------------------------------------------------------------------------------------------------------|---------------------------------------------------------------------------------------------------------------------------------------------------------------------------------------------------------------------|
| <p>open door<br/>turn-on light<br/>close door<br/>open fridge<br/>take celery<br/>take container<br/>take tofu<br/>close fridge<br/>open fridge<br/>take carrot<br/>open drawer<br/>close fridge</p> | <p>put-down vegetable<br/>open cupboard<br/>take board:cutting<br/>put-down board:cutting<br/>close cupboard<br/>open drawer<br/>take knife<br/>take knife<br/>put-down knife<br/>close drawer<br/>put-down knife<br/>open tap</p> | <p>wash courgette<br/>wash courgette<br/>wash carrot<br/>wash carrot<br/>close tap<br/>put-down vegetable<br/>open cupboard<br/>take grater<br/>take pan<br/>put-down pan<br/>close cupboard<br/>close cupboard</p> |
|------------------------------------------------------------------------------------------------------------------------------------------------------------------------------------------------------|------------------------------------------------------------------------------------------------------------------------------------------------------------------------------------------------------------------------------------|---------------------------------------------------------------------------------------------------------------------------------------------------------------------------------------------------------------------|

take courgette  
cut courgette  
turn-on hob  
cut courgette  
cut courgette  
dice courgette  
dice courgette  
dice courgette  
dice courgette  
pour courgette  
throw courgette  
open drawer  
close drawer  
take spatula  
stir courgette  
take salt  
open salt  
pour salt  
put-down salt  
stir courgette  
put-down spatula  
take celery  
wash celery

open tap  
wash celery  
close tap  
put-down celery  
cut celery  
cut celery  
pour celery  
put-down board:cutting  
take celery  
throw celery  
open fridge  
put celery  
close fridge  
take spatula  
stir spatula  
put-down spatula  
open container  
take onion  
take onion  
put-down onion  
close container  
take spatula  
take knife

cut onion  
cut onion  
cut onion  
put-down knife  
take kettle  
open tap  
pour water  
pour water  
close tap  
turn kettle  
take spatula  
stir vegetable  
stir vegetable  
take glass  
take glass  
open cupboard  
put glass  
close cupboard

615

—— (continued) ——
